# Supplementary material
Source: publisher figshare collection journal article supplement (https://springernature.figshare.com/articles/dataset/_/21763214)
Supplement: Supplementary file 1 [file 1]

## Sheet: Fig 3A and B
			Temperature	21–22C										Temperature	21–22C
			Particle	Size (um^2)	Avg Velocity um/h	STD Dev								Particle		Avg Velocity um/h
			a	2.484	0.7	0.21								a		0.7
			b	13.35	1.12	0.23								b		1.12
			c	5.28	0.5	0.26								c		0.5
			d	1.4	0.085	0.26								d		0.085
			e	3.88	0.27	0.16								e		0.27
			f	1.86	0.38	0.18								f		0.38
			g	4.97	0.298	0.17								g		0.298
															average=	0.479
															std-dev	0.341965			Temperature	avg vel.	std
			Temperature	28-36º										Temperature	28-36º				22	0.48	0.34
				Size (um^2)	Avg Velocity um/h	STD Dev								Particle		Avg Velocity um/h			32	1.14	0.32
			h	5.41	0.909745	0.44								h		0.909745			36	1.88	0.83
			i	8.32	0.999385	0.36								i		0.999385			39	2.98	1.54
			j	3.51	1.35424	0.39								j		1.35424
			k	4.05	1.26	0.3								k		1.26
			l	1.62	1.729	0.35								l		1.729
			m	10	0.86	0.31								m		0.86
			n	8.11	0.85	1.44								n		0.85
															average=	1.13748
															std-dev	0.327227
			Temperature	31-40ºC										Temperature	31-40ºC
				Size (um^2)	Avg Velocity um/h	STD Dev								Particle		Avg Velocity um/h
			o	9.73	1.42124	0.46								o		1.42124
			p	9.46	1.01957	0.57								p		1.01957
			q	4.36	1.1087	0.47								q		1.1087
			r	8.11	1.45153	0.55								r		1.45153
			s	6.49	2.38456	0.64								s		2.38456
			t	2.13	3.1	0.57								t		3.1
			u	2.43	2.69	1.59								u		2.69
															average=	1.88223
			09-23-21 data												std-dev	0.829492
			Temperature	36-41ºC
														Temperature	36-41ºC
			Particle	Size (um^2)	Avg Velocity um/h	STD Dev								Particle		Avg Velocity um/h
			v	5.13	2.1495	0.55								v		2.1495
			w	4.49	2.562	0.79								w		2.562
			x	3.21	3.21386	1.3								x		3.21386
			y	5.77	1.84543	0.89								y		1.84543
			z	9.6	1.81846	0.96								z		1.81846
			aa	3.8	6.23423	3.43								aa		6.23423
			ab	1.92	2.18259	0.81								ab		2.18259
															average=	2.97609
															std-dev	1.56404

## Sheet: Fig 3H
		Particle 11		Particle 10		Particle 14		Particle 12		Particle 8		Particle 9		Particle 13
		X	Y offset	X	Y offset	X	Y offset	X	Y offset	X	Y offset	X	Y offset	X	Y offset
		0	7.353	0	5.16	0	14.835	0	9.417	0	0	0	3.612	0	11.739
		-1.032	7.095	0	5.16	-0.129	14.835	0.129	9.546	1.032	0.258	0	3.483	0	11.352
		-1.548	7.095	-0.129	5.031	-0.129	14.577	-0.387	9.804	2.58	0.129	0.645	3.225	0.645	11.61
		-1.806	7.095	-0.129	5.16	-0.258	14.706	0.774	9.933	3.87	0.387	1.161	2.967	1.806	11.481
		-2.064	7.353	0	5.547	-0.258	14.706	1.935	9.804	5.031	0.516	1.29	2.709	2.451	11.223
		-2.322	7.095	0.129	5.289	-0.258	14.835	2.451	9.675	6.321	0.387	1.161	2.193	3.354	11.352
		-3.87	6.837	0	5.16	-0.129	14.577	3.354	9.675	8.643	0.516	1.29	2.451	4.128	11.61
		-5.418	6.708	-0.258	5.418	-0.129	14.706	3.87	10.062	9.546	0.645	1.419	2.322	5.16	11.352
		-6.45	6.708	-0.903	5.289	-0.258	14.706	4.644	9.675	10.836	0.645	1.548	2.064	5.934	11.223
		-6.708	6.579	-1.677	5.16	0	14.577	1.677	9.546	12.255	0.516	1.677	2.193	6.45	11.352
		-7.224	6.45	-2.193	4.902	0.129	14.577	0.903	9.546	13.416	0.387	1.677	2.064	6.45	11.481
		-7.482	6.708	-2.838	5.031	0	14.835	1.032	9.546	14.061	0.516	1.419	2.193	6.708	11.481
		-7.74	6.45	-3.483	4.773	-0.258	14.448	0.903	9.675	14.835	0.645	1.548	2.322	6.966	11.481
		-7.482	6.708	-3.741	4.773	0.516	14.835	1.032	9.546	16.125	1.161	2.58	2.451	7.224	11.739
		-7.482	6.837	-4.257	4.773	1.29	14.964	0.774	9.546	16.641	1.161	3.096	2.322	7.611	11.739
		-7.482	6.708	-5.031	4.257	2.709	14.835	0.774	9.417	17.157	1.161	3.612	2.322	7.869	11.739
		-7.482	6.837	-5.934	4.386	3.87	14.964	0.129	9.288	17.544	1.29	3.612	2.322	8.385	11.739
		-7.224	6.966	-6.708	4.257	5.289	14.964	-1.548	9.159	17.673	1.161	4.128	2.58	8.772	11.739
		-6.708	6.966	-7.869	4.128	5.934	14.835	-3.225	9.159	18.06	1.29	4.773	2.838	9.417	11.61
		-6.45	7.095	-9.546	4.257	6.966	14.964	-6.192	8.772	18.189	1.677	5.031	2.451	9.675	11.481
		-6.45	7.095	-9.933	4.128	6.966	14.706	-8.127	8.514	18.189	1.548	5.031	2.709	10.191	11.352
		-6.192	7.095	-9.546	4.257	8.385	14.835	-8.514	8.385	17.544	1.548	5.16	2.58	10.707	11.481
		-6.45	7.353	-8.514	4.515	9.03	14.964	-8.901	8.385	17.286	1.677	5.289	2.58	11.223	11.61
		-6.579	7.224	-7.74	4.515	9.675	14.835	-9.03	8.643	17.415	1.548	5.418	2.709	11.61	11.481
		-6.192	6.966	-6.966	4.257	9.933	14.835	-9.03	8.514	16.641	1.29	5.547	2.967	11.997	11.094
		-6.063	7.095	-6.063	4.257	10.32	14.706	-9.159	8.127	15.609	1.29	6.063	2.58	12.384	11.481
		-6.063	7.095	-5.16	4.257	11.61	14.319	-9.288	8.514	14.964	1.29	6.708	2.58	12.9	11.352
		-5.805	6.966	-4.644	4.257	11.868	14.19	-9.288	8.385	14.577	1.161	7.224	2.709	13.158	11.352
		-6.063	7.224	-3.999	4.515	12.126	14.19	-9.546	8.514	13.932	1.419	7.095	2.967	13.416	11.223
		-5.805	6.708	-2.967	4.386	12.126	14.061	-9.804	8.514	13.416	1.419			13.932	11.352
		-5.676	6.579	-2.322	4.386	12.9	13.803	-9.546	8.514	13.287	1.419			14.19	11.223
		-5.676	6.579	-1.806	4.515	13.287	13.674	-9.933	8.385	12.642	1.419			14.448	11.223
		-5.805	6.966	-2.064	4.773	14.061	13.674	-9.546	8.514	12.126	1.548			14.577	11.352
		-6.063	6.837	-2.064	4.644	14.448	13.674	-10.32	8.385	11.352	1.161			14.964	11.481
		-6.321	6.837	-2.064	4.515	15.609	13.674	-10.836	8.514	10.965	1.29			15.48	11.61
		-6.321	6.708	-2.064	4.515	15.867	13.545	-11.223	8.514	10.449	1.032			15.867	11.352
		-6.192	6.966	-1.806	4.515	15.996	13.545	-13.158	8.127	10.062	1.161			15.996	11.61
		-6.063	6.966	-1.935	4.515	16.254	13.416	-14.706	8.514	10.062	1.032			15.996	11.352
		-6.192	6.837	-2.451	4.515	16.125	13.416	-15.609	8.127	9.675	1.032			16.254	11.352
		-6.063	6.966	-2.838	4.644	16.254	13.545	-18.447	8.127	9.546	1.29			16.641	11.352
		-6.192	7.224	-3.354	4.773	16.254	13.545	-20.64	7.998	8.772	1.29			17.028	11.481
		-5.805	6.837	-3.483	4.386	16.125	13.545	-21.93	8.127	8.385	1.032			17.286	11.094
		-5.676	6.708	-3.999	4.386	15.996	13.416	-22.704	7.74	7.74	1.032			17.673	11.094
		-5.547	6.708	-3.87	4.386	16.125	13.545	-22.833	7.869	7.224	1.161			18.447	11.352
		-5.547	6.708	-3.483	4.386	16.125	13.287	-22.833	7.998	6.837	0.903			18.834	11.481
		-5.289	7.095	-2.967	4.902	16.254	13.416	-22.833	7.998	6.579	0.903
		-4.386	6.708	-2.58	4.386	16.254	13.287			6.45	0.774
		-3.354	6.708	-2.58	4.644	15.867	13.545			6.192	1.032
		-2.322	6.579	-2.58	4.386	15.996	13.545			5.934	0.774
		-1.806	6.708	-2.322	4.515	16.125	13.545			5.805	0.645
		-1.677	6.966	-1.935	4.773	16.254	13.416			5.418	0.774
		-1.806	6.708	-1.548	4.386	16.125	13.287			5.289	0.516
		-1.806	6.837	-0.903	4.257	16.383	13.287			4.902	0.645
		-1.677	7.095	-0.516	4.644	16.512	13.158			4.257	0.645
		-1.161	7.095	0.258	4.515	16.383	13.287			3.87	0.516
		-0.516	6.837	0.387	4.515	16.512	13.029			3.354	0.387
		0.387	7.095	1.032	4.644	16.383	13.416			2.838	0.645
		1.419	7.095	1.935	4.386	16.254	13.158			2.709	0.774
		1.806	7.224	2.709	4.257	16.383	12.9			2.322	0.774
		2.193	7.353	3.741	4.128	16.125	12.9			1.935	0.645
		3.225	7.482	4.902	4.515	16.383	13.416			2.064	0.903
		5.16	7.095	5.805	3.999	16.512	12.9			1.935	0.516
		6.063	7.353	6.45	3.999	16.512	12.9			1.419	0.645
		6.45	7.482	6.708	4.257	16.383	13.029			1.161	0.645
		6.837	7.224	6.708	4.386	16.512	13.029			0.774	0.645
		6.966	7.482	6.837	3.999	16.383	12.9			0.387	0.516
		6.966	7.224	6.837	4.257	16.899	13.029			-0.129	0.516
		7.224	7.224	6.837	4.128	17.415	13.029			-0.774	0.387
		7.611	7.353	7.095	4.257	17.931	13.158			-0.903	0.645
		7.998	7.353	6.708	3.999	18.447	13.029			-1.548	0.516
		8.385	7.482	6.837	4.128	19.092	13.029			-1.806	0.645
		8.901	7.353	7.095	4.386	19.608	13.029			-2.322	0.645
		9.288	7.353	6.966	4.257	20.253	13.029			-2.58	0.516
		10.062	7.224	6.837	4.128	19.866	12.771			-3.096	0.516
		10.578	7.353	6.966	3.999	19.737	12.771			-3.741	0.258
		10.965	7.224	6.837	3.999	19.608	12.9			-4.386	0.258
		11.352	7.482	6.966	4.257	19.737	12.9			-4.902	0.387
		11.868	7.224	7.095	4.128	19.866	12.771			-5.418	0.258
		12.255	6.966	7.095	3.741	19.737	12.384			-5.934	-0.129
		12.771	7.353	6.966	3.999	19.737	12.9			-6.45	0.129
		13.416	7.353	6.966	3.87	19.737	12.9			-6.966	0
		13.932	7.482	6.837	3.87	19.737	13.029
		14.061	7.611	6.708	3.741	19.737	12.771
		14.319	7.611	6.45	3.87	19.737	13.029
		14.706	7.482			19.737	12.9
		14.964	7.611			19.608	12.771
		14.964	7.611			19.479	12.771
		15.48	7.74
		15.867	7.869
		16.254	7.869
		16.77	7.998
		16.641	7.74
		16.641	7.869
		17.157	7.74
		17.673	7.74
		17.931	7.482
x		18.189	7.482
		18.705	7.74
		19.221	7.998

## Sheet: Fig 3I
			20 C										HEATED 40C
			Velocities um/h										Velocities um/h
		time	Particle #									time	Particle #
			1	2	3	4	5	6	7				11	10	14	12	8	9	12
		0	0	0	0	0	0	0	0			0	0	0	0		0
		30	1.64049	1.64049	2.32	2.80049	1.64049	1.16	0			50	4.128	0.774	1.29		9.03
		60	2.32	3.96049	3.48	1.16	2.32	3.96049	0			80	5.676	2.322	1.032		10.32
		90	2.80049	2.80049	2.80049	2.32	3.48	1.64049	0			110	6.192	4.386	1.29		7.74
		120	1.16	2.32	2.80049	3.48	2.32	1.64049	0			140	3.354	4.902	2.322		5.934
		150	3.48	3.96049	3.48	2.32	2.32	2.32	2.32			170	1.548	4.128	7.224		5.676
		180	1.16	1.16	2.32	2.32	1.16	1.16	0			200	2.064	6.45	6.966		2.58
		210	2.32	2.80049	2.32	1.16	2.32	3.96049	0			230	1.29	5.676	5.934		2.58
		240	3.48	2.80049	3.96049	3.96049	1.16	1.16	2.32			260	2.838	6.192	3.612		3.354
		270		3.48	2.32	1.16	2.32	1.16	1.16			290	1.29	4.644	5.16		4.386
		300		1.64049	3.48	2.32	2.80049	2.32	0			320	3.096	5.418	2.838		3.096
		330		2.80049	2.80049	1.16	2.80049	1.16	0			350	1.806	2.58	3.354		4.902
		360		1.64049	3.48	2.80049	1.64049	2.32	0			380	1.548	0.774	3.354		3.612
		390		1.16	2.80049	2.80049	1.16	2.32	2.32			410	1.29	2.322	1.548		1.806
		420		2.80049	2.32	3.96049	1.64049	3.48	0			440	2.838	3.354	0.774		4.128
		450		2.80049	2.80049	3.48	1.64049	1.64049	1.16			470	1.548	3.096	1.548		3.096
		480		2.32	2.32	2.32	2.80049	3.48	2.32			500	6.966	2.838	1.806		2.58
		510		2.80049	2.32	2.32	1.16	3.96049	2.32			530	2.838	3.612	1.29		2.322
		540		2.32	3.48	1.64049	2.80049	2.80049	1.16			560	2.064	4.902	1.548	0	3.354
		570		2.80049	2.32	2.80049	2.80049	1.16	1.16			590	6.192	4.128	2.58	5.676	3.354		0
		600		1.16	1.16	5.39433	2.32	1.64049	1.16			620	4.386	7.224	2.838	10.32	2.58		5.934
		630		3.96049	2.32	3.96049	2.32	1.64049	1.16			650	7.998	5.16	1.806	2.322	2.838		5.676
		660		3.28098	2.32	1.16	1.16	3.28098	0			680	2.58	1.806	2.064	1.29	2.838		1.29
		690		7.98817	2.80049	2.32	2.32	0	2.80049			710	2.322	2.322	3.612	8.514	3.87		2.322
		720		2.80049	2.32	0	1.16	2.32	2.32			740	3.096	2.064	3.612	12.126	2.58	0	3.354
		750		2.32	2.32	2.32	2.32	2.80049	2.80049			770	4.128	1.29	2.064	1.806	4.128	2.838	3.354
				4.92146	0	3.48		3.48	3.48			800	4.128	2.064	1.806	2.322	4.386	1.806	3.87
												830	4.386	1.29	1.29	1.806		1.548	3.354
												860	2.064	1.935	1.29	3.87		4.644	2.838
												890	2.064		1.161	6.708		3.354	2.064
												920	3.096			12.126		2.322	3.354
												950	2.322			9.804		1.548	1.806
												980	2.58			1.161		4.386	3.096

## Sheet: Fig 3J
		RH	velocity um/h	std dev
		0	0	0
		22	0.85	0.157
		11	0.962	0.202
		55	1.762	0.444
		75	1.58	0.312
	RH	0	11	22	55	75
	average velocity	0	0.962	0.85	1.762	1.58
	stddev	0	0.202	0.157	0.444	0.312

## Sheet: Fig 3K
		HCB 22C isothermal				HCB 40C isothermal
		time	weight (mg)	Mass %
		0.00266	0.863318	100		Time	mass	%mass
		0.0293333	0.863425	100.012
		0.0835	0.863506	100.022		0.0293333	6.20697	100
		0.1335	0.863471	100.018		0.0835	6.20702	100.001
		0.187667	0.863454	100.016		0.1335	6.20705	100.001
		0.241833	0.863453	100.016		0.187667	6.20714	100.003
		0.291833	0.863479	100.019		0.241833	6.20744	100.008
		0.346	0.863654	100.039		0.291833	6.2076	100.01
		0.400167	0.863681	100.042		0.346	6.20791	100.015
		0.450167	0.863636	100.037		0.400167	6.20814	100.019
		0.504333	0.863626	100.036		0.450167	6.20844	100.024
		0.5585	0.86366	100.04		0.504333	6.20888	100.031
		0.6085	0.863609	100.034		0.5585	6.20929	100.037
		0.662667	0.863584	100.031		0.6085	6.20956	100.042
		0.716833	0.863627	100.036		0.662667	6.20988	100.047
		0.766833	0.863643	100.038		0.716833	6.21016	100.051
		0.821	0.863637	100.037		0.766833	6.21047	100.056
		0.875167	0.863657	100.039		0.821	6.21081	100.062
		0.925167	0.863686	100.043		0.875167	6.21108	100.066
		0.975167	0.863653	100.039		0.925167	6.21139	100.071
		1.02933	0.86363	100.036		0.979333	6.2116	100.075
		1.0835	0.863563	100.028		1.0335	6.2117	100.076
		1.1335	0.863582	100.031		1.0835	6.21188	100.079
		1.18767	0.863612	100.034		1.13767	6.21186	100.079
		1.24183	0.863684	100.042		1.19183	6.21173	100.077
		1.29183	0.863652	100.039		1.24183	6.21155	100.074
		1.346	0.863601	100.033		1.296	6.21143	100.072
		1.40017	0.863605	100.033		1.35017	6.2112	100.068
		1.45017	0.863585	100.031		1.40017	6.21093	100.064
		1.50433	0.863541	100.026		1.45017	6.2107	100.06
		1.5585	0.863542	100.026		1.50433	6.2104	100.055
		1.6085	0.863528	100.024		1.5585	6.21027	100.053
		1.66267	0.863477	100.018		1.6085	6.20986	100.047
		1.71683	0.863464	100.017		1.66267	6.20941	100.039
		1.76683	0.863461	100.017		1.71683	6.20928	100.037
		1.821	0.863445	100.015		1.76683	6.20908	100.034
		1.87517	0.863401	100.01		1.821	6.20887	100.031
		1.92517	0.863456	100.016		1.87517	6.20862	100.027
		1.97517	0.863434	100.013		1.92517	6.20847	100.024
		2.02933	0.863449	100.015		1.97933	6.20845	100.024
		2.0835	0.86346	100.016		2.0335	6.20819	100.02
		2.1335	0.863439	100.014		2.0835	6.20806	100.018
		2.18767	0.863416	100.011		2.13767	6.20799	100.017
		2.24183	0.863433	100.013		2.19183	6.20778	100.013
		2.29183	0.863441	100.014		2.24183	6.20757	100.01
		2.346	0.863417	100.011		2.296	6.20757	100.01
		2.40017	0.863374	100.007		2.35017	6.20757	100.01
		2.45017	0.863359	100.005		2.40017	6.20754	100.009
		2.50433	0.863396	100.009		2.45433	6.20735	100.006
		2.5585	0.863401	100.01		2.5085	6.20723	100.004
		2.6085	0.863399	100.009		2.5585	6.20709	100.002
		2.66267	0.863417	100.012		2.61267	6.20695	99.9997
		2.71683	0.86343	100.013		2.66683	6.20693	99.9994
		2.76683	0.863424	100.012		2.71683	6.20674	99.9963
		2.821	0.863437	100.014		2.771	6.20667	99.9952
		2.87517	0.863409	100.011		2.82517	6.20667	99.9952
		2.92517	0.863434	100.013		2.87517	6.20654	99.9931
		2.97517	0.863434	100.013		2.92517	6.20648	99.9922
		3.02933	0.863448	100.015		2.97933	6.20647	99.992
		3.0835	0.863472	100.018		3.0335	6.20643	99.9914
		3.1335	0.863402	100.01		3.0835	6.20636	99.9902
		3.18767	0.863466	100.017		3.13767	6.20632	99.9896
		3.24183	0.863414	100.011		3.19183	6.20629	99.9891
		3.29183	0.86343	100.013		3.24183	6.20623	99.9881
		3.346	0.8635	100.021		3.296	6.2061	99.986
		3.40017	0.8635	100.021		3.35017	6.20602	99.9847
		3.45017	0.863469	100.017		3.40017	6.20606	99.9854
		3.50433	0.863472	100.018		3.45433	6.20603	99.985
		3.5585	0.863442	100.014		3.5085	6.20599	99.9842
		3.6085	0.863382	100.007		3.5585	6.20592	99.9831
		3.66267	0.863434	100.013		3.61267	6.20599	99.9843
		3.71683	0.863497	100.021		3.66683	6.20597	99.984
		3.76683	0.863498	100.021		3.71683	6.20575	99.9805
		3.821	0.863477	100.018		3.771	6.2056	99.9779
		3.87517	0.863435	100.014		3.82517	6.20556	99.9774
		3.92517	0.863427	100.013		3.87517	6.20552	99.9767
		3.97517	0.863407	100.01		3.92933	6.20497	99.9678
		4.02933	0.863457	100.016		3.9835	6.20518	99.9713
		4.0835	0.863483	100.019		4.0335	6.20533	99.9736
		4.1335	0.86346	100.016		4.08767	6.20522	99.9719
		4.18767	0.863417	100.012		4.14183	6.20528	99.9729
		4.24183	0.86335	100.004		4.19183	6.20528	99.9729
		4.29183	0.863321	100		4.246	6.20522	99.9719
		4.346	0.863343	100.003		4.30017	6.20526	99.9725
		4.40017	0.863344	100.003		4.35017	6.20528	99.9728
		4.45017	0.86337	100.006		4.40017	6.20512	99.9703
		4.50433	0.863394	100.009		4.45433	6.20511	99.97
		4.5585	0.863379	100.007		4.5085	6.20512	99.9703
		4.6085	0.86337	100.006		4.5585	6.20507	99.9695
		4.66267	0.863401	100.01		4.61267	6.20508	99.9696
		4.71683	0.863375	100.007		4.66683	6.20509	99.9698
		4.76683	0.863358	100.005		4.71683	6.20509	99.9698
		4.821	0.863378	100.007		4.771	6.20498	99.9681
		4.87517	0.863326	100.001		4.82517	6.20505	99.9691
		4.92517	0.863314	99.9995		4.87517	6.20502	99.9686
		4.97517	0.863309	99.9989		4.92933	6.20502	99.9687
		5.02933	0.863377	100.007		4.9835	6.20501	99.9685
		5.0835	0.863374	100.007		5.0335	6.205	99.9683
		5.1335	0.863359	100.005		5.08767	6.20502	99.9686
		5.18767	0.863348	100.004		5.14183	6.20496	99.9677
		5.24183	0.863359	100.005		5.19183	6.20494	99.9674
		5.29183	0.863319	100		5.246	6.20493	99.9672
		5.346	0.863291	99.9969		5.30017	6.20496	99.9677
		5.40017	0.863316	99.9998		5.35017	6.20491	99.9668
		5.45017	0.863335	100.002		5.40433	6.20494	99.9673
		5.50433	0.863318	100		5.4585	6.20494	99.9673
		5.5585	0.863358	100.005		5.5085	6.20487	99.9662
		5.6085	0.863369	100.006		5.56267	6.20478	99.9648
		5.66267	0.863326	100.001		5.61683	6.2048	99.965
		5.71683	0.863337	100.002		5.66683	6.20481	99.9652
		5.76683	0.863345	100.003		5.721	6.20475	99.9643
		5.821	0.863303	99.9983		5.77517	6.2048	99.9651
		5.87517	0.863322	100.001		5.82517	6.20481	99.9652
		5.92517	0.863378	100.007		5.87517	6.20469	99.9633
		5.97517	0.863321	100		5.92933	6.20469	99.9633
		6.02933	0.863263	99.9936		5.9835	6.20473	99.9639
		6.0835	0.863288	99.9965		6.0335	6.20474	99.9642
		6.1335	0.86333	100.001		6.08767	6.20469	99.9634
		6.18767	0.863364	100.005		6.14183	6.20467	99.9631
		6.24183	0.86337	100.006		6.19183	6.20471	99.9636
		6.29183	0.863347	100.003		6.246	6.20464	99.9624
		6.346	0.863331	100.002		6.30017	6.20467	99.963
		6.40017	0.863295	99.9973		6.35017	6.20472	99.9639
		6.45017	0.863273	99.9948		6.40433	6.20473	99.9639
		6.50433	0.863269	99.9944		6.4585	6.20469	99.9633
		6.5585	0.863225	99.9893		6.5085	6.20465	99.9626
		6.6085	0.863255	99.9928		6.56267	6.20465	99.9627
		6.66267	0.86341	100.011		6.61683	6.20466	99.9628
		6.71683	0.863469	100.017		6.66683	6.20465	99.9626
		6.76683	0.863423	100.012		6.721	6.20455	99.9611
		6.821	0.863332	100.002		6.77517	6.20454	99.9609
		6.87517	0.863358	100.005		6.82517	6.20458	99.9615
		6.92517	0.863377	100.007		6.87933	6.20462	99.9621
		6.97517	0.863312	99.9994		6.9335	6.20462	99.9622
		7.02933	0.863277	99.9952		6.9835	6.20457	99.9614
		7.0835	0.863298	99.9977		7.03767	6.20458	99.9616
		7.1335	0.863272	99.9946		7.09183	6.20466	99.9628
		7.18767	0.863258	99.993		7.14183	6.20467	99.9629
		7.24183	0.863266	99.994		7.196	6.20466	99.9628
		7.29183	0.863318	100		7.25017	6.20474	99.9641
		7.346	0.863316	99.9998		7.30017	6.20474	99.9641
		7.40017	0.863355	100.004		7.35017	6.20477	99.9647
		7.45017	0.863371	100.006		7.40433	6.20488	99.9665
		7.50433	0.863324	100.001		7.4585	6.20491	99.9668
		7.5585	0.863398	100.009		7.5085	6.20489	99.9666
		7.6085	0.86342	100.012		7.56267	6.20486	99.9661
		7.66267	0.863399	100.009		7.61683	6.20489	99.9666
		7.71683	0.8634	100.01		7.66683	6.20495	99.9675
		7.76683	0.863426	100.012		7.721	6.20493	99.9671
		7.821	0.86338	100.007		7.77517	6.20489	99.9666
		7.87517	0.863362	100.005		7.82517	6.20493	99.9671
		7.92517	0.863402	100.01		7.87933	6.20493	99.9672
		7.97517	0.863436	100.014		7.9335	6.20498	99.9679
		8.02933	0.863381	100.007		7.9835	6.20495	99.9675
		8.0835	0.86338	100.007		8.03767	6.20496	99.9676
		8.1335	0.863427	100.013		8.09183	6.205	99.9683
		8.18767	0.863376	100.007		8.14183	6.20498	99.968
		8.24183	0.863348	100.003		8.196	6.20502	99.9686
		8.29183	0.863384	100.008		8.25017	6.205	99.9682
		8.346	0.863399	100.009		8.30017	6.205	99.9682
		8.40017	0.863406	100.01		8.35433	6.20496	99.9677
		8.45017	0.86344	100.014		8.4085	6.20493	99.9671
		8.50433	0.863424	100.012		8.4585	6.20495	99.9675
		8.5585	0.863409	100.011		8.51267	6.20499	99.9681
		8.6085	0.863444	100.015		8.56683	6.20498	99.968
		8.66267	0.863419	100.012		8.61683	6.20497	99.9679
		8.71683	0.863361	100.005		8.671	6.20491	99.9668
		8.76683	0.863356	100.004		8.72517	6.20488	99.9664
		8.821	0.863333	100.002		8.77517	6.20489	99.9666
		8.87517	0.863332	100.002		8.82517	6.20491	99.9668
		8.92517	0.863403	100.01		8.87933	6.20488	99.9664
		8.97517	0.863446	100.015		8.9335	6.20482	99.9655
		9.02933	0.863426	100.013		8.9835	6.20486	99.966
		9.0835	0.863438	100.014		9.03767	6.20484	99.9657
		9.1335	0.863446	100.015		9.09183	6.20474	99.9641
		9.18767	0.863455	100.016		9.14183	6.20474	99.9642
		9.24183	0.863415	100.011		9.196	6.20473	99.9639
		9.29183	0.863424	100.012		9.25017	6.20471	99.9636
		9.346	0.863398	100.009		9.30017	6.20475	99.9643
		9.40017	0.863482	100.019		9.35433	6.20475	99.9643
		9.45017	0.863479	100.019		9.4085	6.20473	99.9639
		9.50433	0.863477	100.018		9.4585	6.20471	99.9636
		9.5585	0.863478	100.019		9.51267	6.20472	99.9639
		9.6085	0.863369	100.006		9.56683	6.20473	99.964
		9.66267	0.863398	100.009		9.61683	6.20474	99.9641
		9.71683	0.863397	100.009		9.671	6.2047	99.9636
		9.76683	0.863337	100.002		9.72517	6.20463	99.9623
		9.821	0.863354	100.004		9.77517	6.20461	99.962
		9.87517	0.863391	100.008		9.82933	6.20456	99.9612
		9.92517	0.863352	100.004		9.8835	6.20458	99.9615
		9.97517	0.863416	100.011		9.9335	6.20459	99.9617
		10.0293	0.863437	100.014		9.98767	6.20458	99.9616
		10.0835	0.863414	100.011		10.0418	6.20458	99.9615
		10.1335	0.863356	100.004		10.0918	6.20456	99.9612
		10.1877	0.863326	100.001		10.146	6.20458	99.9615
		10.2418	0.863322	100		10.2002	6.2046	99.9619
		10.2918	0.86335	100.004		10.2502	6.20465	99.9627
		10.346	0.863408	100.01		10.3002	6.20459	99.9617
		10.4002	0.863388	100.008		10.3543	6.20456	99.9612
		10.4502	0.863312	99.9994		10.4085	6.20457	99.9613
		10.5043	0.863369	100.006		10.4585	6.2045	99.9603
		10.5585	0.86345	100.015		10.5127	6.20455	99.9611
		10.6085	0.863434	100.014		10.5668	6.20463	99.9624
		10.6627	0.863402	100.01		10.6168	6.20462	99.9621
		10.7168	0.863359	100.005		10.671	6.20454	99.9609
		10.7668	0.863363	100.005		10.7252	6.20452	99.9605
		10.821	0.863457	100.016		10.7752	6.20446	99.9597
		10.8752	0.863452	100.015		10.8293	6.20446	99.9597
		10.9252	0.863431	100.013		10.8835	6.20446	99.9597
		10.9752	0.86337	100.006		10.9335	6.20447	99.9597
		11.0293	0.863357	100.004		10.9877	6.20443	99.9592
		11.0835	0.863421	100.012		11.0418	6.20441	99.9589
		11.1335	0.863345	100.003		11.0918	6.20446	99.9596
		11.1877	0.863388	100.008		11.146	6.20449	99.9601
		11.2418	0.863422	100.012		11.2002	6.2045	99.9603
		11.2918	0.863341	100.003		11.2502	6.20451	99.9604
		11.346	0.863382	100.007		11.3043	6.20447	99.9598
		11.4002	0.863377	100.007		11.3585	6.20441	99.9588
		11.4502	0.863232	99.9901		11.4085	6.20439	99.9585
		11.5043	0.863027	99.9664		11.4627	6.20445	99.9594
		11.5585	0.863162	99.982		11.5168	6.20453	99.9607
		11.6085	0.863113	99.9762		11.5668	6.20454	99.9609
		11.6627	0.863183	99.9844		11.621	6.20445	99.9594
		11.7168	0.863351	100.004		11.6752	6.20444	99.9594
		11.7668	0.863372	100.006		11.7252	6.20444	99.9593
		11.821	0.863367	100.006		11.7752	6.20443	99.9592
		11.8752	0.863315	99.9997		11.8293	6.2044	99.9586
		11.9252	0.863344	100.003		11.8835	6.20448	99.9599
		11.9752	0.863386	100.008		11.9335	6.20452	99.9606
		12.0293	0.863389	100.008		11.9877	6.20445	99.9595
		12.0835	0.863366	100.006		12.0418	6.20436	99.958
		12.1335	0.863444	100.015		12.0918	6.20435	99.9578
		12.1877	0.863459	100.016		12.146	6.20436	99.9579
		12.2418	0.863361	100.005		12.2002	6.20439	99.9585
		12.2918	0.863382	100.007		12.2502	6.20437	99.9581
		12.346	0.863432	100.013		12.3043	6.20435	99.9578
		12.4002	0.863421	100.012		12.3585	6.20437	99.9581
		12.4502	0.863393	100.009		12.4085	6.20436	99.958
		12.5043	0.863387	100.008		12.4627	6.20434	99.9576
		12.5585	0.863428	100.013		12.5168	6.20434	99.9577
		12.6085	0.863399	100.009		12.5668	6.20436	99.958
		12.6627	0.86324	99.991		12.621	6.20432	99.9574
		12.7168	0.863093	99.9739		12.6752	6.2043	99.957
		12.7668	0.863337	100.002		12.7252	6.20432	99.9574
		12.821	0.863353	100.004		12.7793	6.20423	99.9559
		12.8752	0.863341	100.003		12.8335	6.20422	99.9557
		12.9252	0.863356	100.004		12.8835	6.20424	99.956
		12.9752	0.863353	100.004		12.9377	6.20427	99.9565
		13.0293	0.863421	100.012		12.9918	6.20424	99.9561
		13.0835	0.863424	100.012		13.0418	6.20418	99.9551
		13.1335	0.863441	100.014		13.096	6.20424	99.9561
		13.1877	0.863442	100.014		13.1502	6.20429	99.9569
		13.2418	0.863383	100.008		13.2002	6.20427	99.9565
		13.2918	0.863367	100.006		13.2502	6.20425	99.9562
		13.346	0.863414	100.011		13.3043	6.2042	99.9555
		13.4002	0.863434	100.013		13.3585	6.2042	99.9554
		13.4502	0.863352	100.004		13.4085	6.20414	99.9545
		13.5043	0.863405	100.01		13.4627	6.20417	99.9549
		13.5585	0.863473	100.018		13.5168	6.20414	99.9544
		13.6085	0.863374	100.007		13.5668	6.20409	99.9537
		13.6627	0.863316	99.9997		13.621	6.20411	99.9541
		13.7168	0.863336	100.002		13.6752	6.20416	99.9548
		13.7668	0.863364	100.005		13.7252	6.20414	99.9545
		13.821	0.863355	100.004		13.7793	6.20414	99.9544
		13.8752	0.863426	100.012		13.8335	6.20412	99.9542
		13.9252	0.863417	100.011		13.8835	6.20412	99.9541
		13.9752	0.86338	100.007		13.9377	6.20418	99.9552
		14.0293	0.863355	100.004		13.9918	6.2042	99.9554
		14.0835	0.86333	100.001		14.0418	6.20419	99.9553
		14.1335	0.863339	100.002		14.096	6.20416	99.9548
		14.1877	0.863391	100.008		14.1502	6.20414	99.9545
		14.2418	0.863466	100.017		14.2002	6.20406	99.9532
		14.2918	0.863426	100.012		14.2543	6.20406	99.9532
		14.346	0.86342	100.012		14.3085	6.20411	99.954
		14.4002	0.863398	100.009		14.3585	6.20416	99.9548
		14.4502	0.863396	100.009		14.4127	6.20409	99.9536
		14.5043	0.863374	100.006		14.4668	6.20407	99.9533
		14.5585	0.86331	99.9991		14.5168	6.20406	99.9532
		14.6085	0.863325	100.001		14.571	6.20411	99.9541
		14.6627	0.863405	100.01		14.6252	6.20415	99.9546
		14.7168	0.863367	100.006		14.6752	6.20411	99.9539
		14.7668	0.86329	99.9968		14.7252	6.20409	99.9536
		14.821	0.863361	100.005		14.7793	6.20411	99.954
		14.8752	0.863407	100.01		14.8335	6.20409	99.9536
		14.9252	0.863394	100.009		14.8835	6.20403	99.9527
		14.9752	0.86336	100.005		14.9377	6.20401	99.9524
		15.0293	0.863281	99.9958		14.9918	6.20403	99.9526
		15.0835	0.863292	99.997		15.0418	6.20397	99.9517
		15.1335	0.863335	100.002		15.096	6.20397	99.9517
		15.1877	0.863307	99.9987		15.1502	6.20399	99.952
		15.2418	0.863367	100.006		15.2002	6.20397	99.9517
		15.2918	0.863398	100.009		15.2543	6.20397	99.9516
		15.346	0.863408	100.01		15.3085	6.204	99.9522
		15.4002	0.863408	100.01		15.3585	6.20398	99.9519
		15.4502	0.863329	100.001		15.4127	6.20401	99.9524
		15.5043	0.863356	100.004		15.4668	6.20397	99.9517
		15.5585	0.863415	100.011		15.5168	6.20392	99.9509
		15.6085	0.863421	100.012		15.571	6.20394	99.9512
		15.6627	0.863407	100.01		15.6252	6.20395	99.9514
		15.7168	0.863378	100.007		15.6752	6.20391	99.9507
		15.7668	0.863343	100.003		15.7293	6.20397	99.9517
		15.821	0.863329	100.001		15.7835	6.20396	99.9516
		15.8752	0.863361	100.005		15.8335	6.20395	99.9515
		15.9252	0.863418	100.012		15.8877	6.20396	99.9516
		15.9752	0.863427	100.013		15.9418	6.20395	99.9514
		16.0293	0.863427	100.013		15.9918	6.20393	99.951
		16.0835	0.863406	100.01		16.046	6.20389	99.9504
		16.1335	0.863303	99.9983		16.1002	6.2039	99.9505
		16.1877	0.863306	99.9986		16.1502	6.20386	99.95
		16.2418	0.863391	100.008		16.2002	6.20386	99.95
		16.2918	0.863384	100.008		16.2543	6.20385	99.9497
		16.346	0.863366	100.006		16.3085	6.20391	99.9508
		16.4002	0.863302	99.9981		16.3585	6.20385	99.9498
		16.4502	0.86336	100.005		16.4127	6.20384	99.9496
		16.5043	0.863409	100.011		16.4668	6.20391	99.9507
		16.5585	0.863387	100.008		16.5168	6.20382	99.9494
		16.6085	0.863336	100.002		16.571	6.20382	99.9493
		16.6627	0.863307	99.9988		16.6252	6.20382	99.9492
		16.7168	0.863322	100		16.6752	6.20382	99.9492
		16.7668	0.86335	100.004		16.7293	6.20378	99.9487
		16.821	0.863326	100.001		16.7835	6.2038	99.9489
		16.8752	0.863325	100.001		16.8335	6.20376	99.9483
		16.9252	0.863336	100.002		16.8877	6.20375	99.9482
		16.9752	0.863368	100.006		16.9418	6.20385	99.9498
		17.0293	0.863327	100.001		16.9918	6.20383	99.9494
		17.0835	0.863372	100.006		17.046	6.20378	99.9486
		17.1335	0.86339	100.008		17.1002	6.20381	99.9492
		17.1877	0.863389	100.008		17.1502	6.20383	99.9494
		17.2418	0.86337	100.006		17.2043	6.20381	99.9491
		17.2918	0.863391	100.009		17.2585	6.20374	99.9481
		17.346	0.863364	100.005		17.3085	6.20376	99.9483
		17.4002	0.863246	99.9917		17.3627	6.20381	99.9492
		17.4502	0.863286	99.9963		17.4168	6.20374	99.948
		17.5043	0.863338	100.002		17.4668	6.20367	99.9469
		17.5585	0.863338	100.002		17.521	6.20374	99.948
		17.6085	0.863414	100.011		17.5752	6.20374	99.948
		17.6627	0.863367	100.006		17.6252	6.20372	99.9478
		17.7168	0.863358	100.005		17.6752	6.20372	99.9477
		17.7668	0.863263	99.9937		17.7293	6.20375	99.9482
		17.821	0.863294	99.9972		17.7835	6.20371	99.9475
		17.8752	0.863323	100.001		17.8335	6.20372	99.9478
		17.9252	0.863344	100.003		17.8877	6.20376	99.9483
		17.9752	0.863356	100.004		17.9418	6.20375	99.9482
		18.0293	0.863332	100.002		17.9918	6.20371	99.9475
		18.0835	0.863368	100.006		18.046	6.20364	99.9464
		18.1335	0.863337	100.002		18.1002	6.20359	99.9456
		18.1877	0.863295	99.9974		18.1502	6.20367	99.9469
		18.2418	0.863306	99.9986		18.2043	6.20365	99.9466
		18.2918	0.863307	99.9987		18.2585	6.20364	99.9464
		18.346	0.863334	100.002		18.3085	6.20362	99.9461
		18.4002	0.863416	100.011		18.3627	6.20362	99.9461
		18.4502	0.863422	100.012		18.4168	6.20363	99.9462
		18.5043	0.86338	100.007		18.4668	6.20364	99.9464
		18.5585	0.863311	99.9992		18.521	6.2036	99.9458
		18.6085	0.863316	99.9997		18.5752	6.20359	99.9456
		18.6627	0.863105	99.9753		18.6252	6.20364	99.9465
		18.7168	0.862724	99.9312		18.6793	6.20355	99.9449
		18.7668	0.863161	99.9819		18.7335	6.20349	99.944
		18.821	0.863453	100.016		18.7835	6.20352	99.9445
		18.8752	0.863441	100.014		18.8377	6.20353	99.9446
		18.9252	0.863389	100.008		18.8918	6.20358	99.9454
		18.9752	0.86338	100.007		18.9418	6.20361	99.9459
		19.0293	0.863379	100.007		18.996	6.20359	99.9456
		19.0835	0.863378	100.007		19.0502	6.20353	99.9447
		19.1335	0.863352	100.004		19.1002	6.20351	99.9443
		19.1877	0.863356	100.004		19.1502	6.20352	99.9445
		19.2418	0.863348	100.004		19.2043	6.20353	99.9446
		19.2918	0.863317	99.9999		19.2585	6.20356	99.9451
		19.346	0.863352	100.004		19.3085	6.20351	99.9443
		19.4002	0.863381	100.007		19.3627	6.2035	99.9442
		19.4502	0.86337	100.006		19.4168	6.2035	99.9441
		19.5043	0.863336	100.002		19.4668	6.20348	99.9438
		19.5585	0.86333	100.001		19.521	6.20349	99.944
		19.6085	0.863368	100.006		19.5752	6.20347	99.9437
		19.6627	0.863402	100.01		19.6252	6.20346	99.9435
		19.7168	0.863351	100.004		19.6793	6.20349	99.944
		19.7668	0.863013	99.9647		19.7335	6.20343	99.943
		19.821	0.863107	99.9755		19.7835	6.20331	99.9411
		19.8752	0.863241	99.9911		19.8377	6.20337	99.942
		19.9252	0.863229	99.9898		19.8918	6.20334	99.9416
		19.9752	0.863322	100.001		19.9418	6.20335	99.9418
		20.0293	0.863359	100.005		19.996	6.20334	99.9415
		20.0835	0.863448	100.015		20.0502	6.20336	99.9419
		20.1335	0.863419	100.012		20.1002	6.20337	99.942
		20.1877	0.863405	100.01		20.1543	6.20336	99.9419
		20.2418	0.863337	100.002		20.2085	6.20338	99.9422
		20.2918	0.863313	99.9994		20.2585	6.2034	99.9425
		20.346	0.86324	99.991		20.3127	6.20331	99.941
		20.4002	0.863243	99.9914		20.3668	6.20331	99.9411
		20.4502	0.863299	99.9979		20.4168	6.20332	99.9412
		20.5043	0.86337	100.006		20.471	6.20329	99.9407
		20.5585	0.863378	100.007		20.5252	6.20331	99.9411
		20.6085	0.863311	99.9992		20.5752	6.20334	99.9415
		20.6627	0.863287	99.9964		20.6252	6.20338	99.9423
		20.7168	0.863316	99.9997		20.6793	6.20339	99.9423
		20.7668	0.863257	99.9929		20.7335	6.20328	99.9406
		20.821	0.863283	99.996		20.7835	6.20326	99.9403
		20.8752	0.86336	100.005		20.8377	6.2033	99.9409
		20.9252	0.863371	100.006		20.8918	6.20323	99.9398
		20.9752	0.863327	100.001		20.9418	6.2033	99.941
		21.0293	0.863278	99.9953		20.996	6.20336	99.9418
		21.0835	0.863287	99.9964		21.0502	6.20329	99.9407
		21.1335	0.86335	100.004		21.1002	6.20324	99.94
		21.1877	0.863353	100.004		21.1543	6.20324	99.9399
		21.2418	0.863308	99.9988		21.2085	6.20327	99.9404
		21.2918	0.863328	100.001		21.2585	6.20325	99.9401
		21.346	0.863372	100.006		21.3127	6.20327	99.9404
		21.4002	0.863375	100.007		21.3668	6.20326	99.9402
		21.4502	0.863351	100.004		21.4168	6.20319	99.9391
		21.5043	0.863316	99.9998		21.471	6.20317	99.9388
		21.5585	0.863348	100.003		21.5252	6.20317	99.9388
		21.6085	0.863321	100		21.5752	6.20319	99.9392
		21.6627	0.863264	99.9937		21.6293	6.20324	99.94
		21.7168	0.863374	100.006		21.6835	6.20322	99.9397
		21.7668	0.863381	100.007		21.7335	6.20317	99.9388
		21.821	0.863364	100.005		21.7877	6.2032	99.9393
		21.8752	0.863418	100.012		21.8418	6.20317	99.9388
		21.9252	0.863378	100.007		21.8918	6.2031	99.9376
		21.9752	0.863338	100.002		21.946	6.20311	99.9378
		22.0293	0.863314	99.9996		22.0002	6.20319	99.9392
		22.0835	0.863366	100.006		22.0502	6.20319	99.9391
		22.1335	0.863359	100.005		22.1002	6.20319	99.9392
		22.1877	0.863298	99.9977		22.1543	6.20315	99.9386
		22.2418	0.863325	100.001		22.2085	6.2031	99.9377
		22.2918	0.863311	99.9992		22.2585	6.20312	99.938
		22.346	0.863277	99.9952		22.3127	6.20314	99.9383
		22.4002	0.863343	100.003		22.3668	6.20315	99.9385
		22.4502	0.863403	100.01		22.4168	6.2032	99.9393
		22.5043	0.863355	100.004		22.471	6.2031	99.9377
		22.5585	0.863341	100.003		22.5252	6.20306	99.9371
		22.6085	0.863333	100.002		22.5752	6.20314	99.9383
		22.6627	0.863318	100		22.6293	6.20316	99.9387
		22.7168	0.863274	99.995		22.6835	6.20314	99.9384
		22.7668	0.86329	99.9968		22.7335	6.2031	99.9377
		22.821	0.863282	99.9958		22.7877	6.20307	99.9372
		22.8752	0.863316	99.9998		22.8418	6.20308	99.9374
		22.9252	0.863304	99.9984		22.8918	6.20307	99.9372
		22.9752	0.86336	100.005		22.946	6.20306	99.937
		23.0293	0.863352	100.004		23.0002	6.20305	99.9369
		23.0835	0.863332	100.002		23.0502	6.20309	99.9376
		23.1335	0.863349	100.004		23.1043	6.20311	99.9379
		23.1877	0.863291	99.9969		23.1585	6.20314	99.9383
		23.2418	0.863301	99.9981		23.2085	6.20308	99.9373
		23.2918	0.863265	99.9939		23.2627	6.20298	99.9358
		23.346	0.863259	99.9931		23.3168	6.20298	99.9357
		23.4002	0.863227	99.9895		23.3668	6.203	99.9361
		23.4502	0.863227	99.9894		23.421	6.20301	99.9362
		23.5043	0.86333	100.001		23.4752	6.20296	99.9355
		23.5585	0.863359	100.005		23.5252	6.20291	99.9347
		23.6085	0.863352	100.004		23.5752	6.20292	99.9348
		23.6627	0.863295	99.9974		23.6293	6.20298	99.9358
		23.7168	0.863302	99.9981		23.6835	6.20301	99.9363
		23.7668	0.863265	99.9938		23.7335	6.20299	99.9359
		23.821	0.863311	99.9992		23.7877	6.203	99.9361
		23.8752	0.863316	99.9997		23.8418	6.20293	99.935
		23.9252	0.863279	99.9955		23.8918	6.20283	99.9334
		23.9752	0.863308	99.9989		23.946	6.20291	99.9346
		24.0293	0.86331	99.9991		24.0002	6.20293	99.935
		24.0835	0.863315	99.9997		24.0502	6.20295	99.9353
		24.1335	0.863288	99.9965		24.1043	6.20297	99.9357
		24.1877	0.863259	99.9932		24.1585	6.20295	99.9352
		24.2418	0.863139	99.9793		24.2085	6.20293	99.935
		24.2918	0.862682	99.9263		24.2627	6.20288	99.9341
		24.346	0.863013	99.9647		24.3168	6.20284	99.9336
		24.4002	0.863319	100		24.3668	6.20284	99.9336
		24.4502	0.863285	99.9962		24.421	6.20289	99.9344
		24.5043	0.863279	99.9956		24.4752	6.2029	99.9345
		24.5585	0.863325	100.001		24.5252	6.20291	99.9347
		24.6085	0.863344	100.003		24.5793	6.20291	99.9346
		24.6627	0.863325	100.001		24.6335	6.20283	99.9334
		24.7168	0.863184	99.9845		24.6835	6.20289	99.9344
		24.7668	0.863108	99.9757		24.7377	6.2029	99.9345
		24.821	0.863319	100		24.7918	6.20284	99.9334
		24.8752	0.863336	100.002		24.8418	6.20287	99.9341
		24.9252	0.863328	100.001		24.896	6.20281	99.933
		24.9752	0.863333	100.002		24.9502	6.20284	99.9335
		25.0293	0.863377	100.007		25.0002	6.20285	99.9337
		25.0835	0.863345	100.003		25.0502	6.20287	99.934
		25.1335	0.863298	99.9976		25.1043	6.20284	99.9335
		25.1877	0.863291	99.9968		25.1585	6.2028	99.9329
		25.2418	0.863329	100.001		25.2085	6.20283	99.9333
		25.2918	0.86333	100.001		25.2627	6.20282	99.9331
		25.346	0.863284	99.996		25.3168	6.20287	99.934
		25.4002	0.863272	99.9947		25.3668	6.20282	99.9332
		25.4502	0.863289	99.9967		25.421	6.20278	99.9325
		25.5043	0.863304	99.9984		25.4752	6.20274	99.9318
		25.5585	0.863338	100.002		25.5252	6.2027	99.9313
		25.6085	0.863333	100.002		25.5793	6.20276	99.9322
		25.6627	0.863325	100.001		25.6335	6.20276	99.9322
		25.7168	0.863334	100.002		25.6835	6.20274	99.9319
		25.7668	0.863368	100.006		25.7377	6.2028	99.9329
		25.821	0.86336	100.005		25.7918	6.2028	99.9329
		25.8752	0.863352	100.004		25.8418	6.20274	99.9319
		25.9252	0.863326	100.001		25.896	6.20267	99.9307
		25.9752	0.863283	99.9959		25.9502	6.2027	99.9312
		26.0293	0.863248	99.9919		26.0002	6.20276	99.9323
		26.0835	0.863305	99.9984		26.0543	6.2027	99.9313
		26.1335	0.863352	100.004		26.1085	6.20273	99.9317
		26.1877	0.863335	100.002		26.1585	6.20271	99.9314
		26.2418	0.863301	99.9981		26.2127	6.20266	99.9306
		26.2918	0.8633	99.9979		26.2668	6.20264	99.9303
		26.346	0.863312	99.9993		26.3168	6.2026	99.9296
		26.4002	0.863338	100.002		26.371	6.20261	99.9299
		26.4502	0.863345	100.003		26.4252	6.2026	99.9296
		26.5043	0.86334	100.003		26.4752	6.20267	99.9308
		26.5585	0.863347	100.003		26.5252	6.2027	99.9313
		26.6085	0.863293	99.9971		26.5793	6.20268	99.931
		26.6627	0.863277	99.9953		26.6335	6.20263	99.9302
		26.7168	0.863329	100.001		26.6835	6.20262	99.9299
		26.7668	0.863368	100.006		26.7377	6.20268	99.9309
		26.821	0.863338	100.002		26.7918	6.20269	99.9311
		26.8752	0.863311	99.9992		26.8418	6.20264	99.9304
		26.9252	0.863323	100.001		26.896	6.20266	99.9306
		26.9752	0.863332	100.002		26.9502	6.20264	99.9302
		27.0293	0.863326	100.001		27.0002	6.20264	99.9304
		27.0835	0.863313	99.9995		27.0543	6.20266	99.9307
		27.1335	0.863326	100.001		27.1085	6.20262	99.93
		27.1877	0.863288	99.9965		27.1585	6.20262	99.93
		27.2418	0.863335	100.002		27.2127	6.20263	99.9301
		27.2918	0.863322	100		27.2668	6.20257	99.9292
		27.346	0.863336	100.002		27.3168	6.20257	99.9292
		27.4002	0.863317	99.9999		27.371	6.20259	99.9296
		27.4502	0.863329	100.001		27.4252	6.2026	99.9296
		27.5043	0.863312	99.9993		27.4752	6.20259	99.9294
		27.5585	0.863366	100.006		27.5293	6.20252	99.9284
		27.6085	0.863363	100.005		27.5835	6.2025	99.928
		27.6627	0.863344	100.003		27.6335	6.20248	99.9277
		27.7168	0.863367	100.006		27.6877	6.2025	99.9281
		27.7668	0.863353	100.004		27.7418	6.20248	99.9277
		27.821	0.863369	100.006		27.7918	6.20247	99.9275
		27.8752	0.863359	100.005		27.846	6.20249	99.9279
		27.9252	0.863357	100.005		27.9002	6.20241	99.9266
		27.9752	0.86337	100.006		27.9502	6.20238	99.9261
		28.0293	0.863306	99.9986		28.0002	6.20234	99.9255
		28.0835	0.863367	100.006		28.0543	6.2024	99.9264
		28.1335	0.863306	99.9986		28.1085	6.20244	99.927
		28.1877	0.863319	100		28.1585	6.20246	99.9273
		28.2418	0.863357	100.005		28.2127	6.20241	99.9266
		28.2918	0.863345	100.003		28.2668	6.20242	99.9268
		28.346	0.863344	100.003		28.3168	6.20244	99.927
		28.4002	0.863362	100.005		28.371	6.2024	99.9265
		28.4502	0.863379	100.007		28.4252	6.20244	99.927
		28.5043	0.863312	99.9993		28.4752	6.20247	99.9276
		28.5585	0.863339	100.002		28.5293	6.20245	99.9272
		28.6085	0.863315	99.9996		28.5835	6.20244	99.927
		28.6627	0.863316	99.9998		28.6335	6.20239	99.9263
		28.7168	0.863343	100.003		28.6877	6.20238	99.9261
		28.7668	0.863313	99.9994		28.7418	6.20241	99.9266
		28.821	0.863254	99.9926		28.7918	6.20239	99.9262
		28.8752	0.863272	99.9947		28.846	6.20238	99.9261
		28.9252	0.863318	100		28.9002	6.20242	99.9267
		28.9752	0.863345	100.003		28.9502	6.20235	99.9256
		29.0293	0.863341	100.003		29.0043	6.20234	99.9255
		29.0835	0.863314	99.9996		29.0585	6.20231	99.925
		29.1335	0.863315	99.9997		29.1085	6.20233	99.9253
		29.1877	0.863337	100.002		29.1627	6.20242	99.9268
		29.2418	0.863342	100.003		29.2168	6.20238	99.9261
		29.2918	0.863336	100.002		29.2668	6.20236	99.9257
		29.346	0.863303	99.9983		29.321	6.20237	99.9259
		29.4002	0.863276	99.9951		29.3752	6.20237	99.9259
		29.4502	0.863301	99.998		29.4252	6.20229	99.9246
		29.5043	0.863317	99.9999		29.4752	6.20226	99.9242
		29.5585	0.863262	99.9935		29.5293	6.20227	99.9243
		29.6085	0.863297	99.9976		29.5835	6.20228	99.9245
		29.6627	0.863346	100.003		29.6335	6.20227	99.9243
		29.7168	0.863301	99.998		29.6877	6.20226	99.9242
		29.7668	0.863375	100.007		29.7418	6.20227	99.9244
		29.821	0.863313	99.9994		29.7918	6.20231	99.925
		29.8752	0.863247	99.9918		29.846	6.20226	99.9241
		29.9252	0.863304	99.9984		29.9002	6.20221	99.9234
		29.9752	0.863301	99.9981		29.9502	6.2022	99.9232
		30.0293	0.863331	100.002		30.0043	6.20221	99.9234
		30.0835	0.863307	99.9987		30.0585	6.20226	99.9242
		30.1335	0.863339	100.002		30.1085	6.20222	99.9235
		30.1877	0.863364	100.005		30.1627	6.20224	99.9239
		30.2418	0.863335	100.002		30.2168	6.20221	99.9234
		30.2918	0.863311	99.9992		30.2668	6.20222	99.9236
		30.346	0.863255	99.9927		30.321	6.20221	99.9234
		30.4002	0.863246	99.9917		30.3752	6.20217	99.9228
		30.4502	0.863285	99.9962		30.4252	6.20221	99.9233
		30.5043	0.863341	100.003		30.4793	6.20217	99.9227
		30.5585	0.863345	100.003		30.5335	6.20216	99.9226
		30.6085	0.863293	99.9971		30.5835	6.20214	99.9223
		30.6627	0.863308	99.9989		30.6377	6.20208	99.9213
		30.7168	0.863321	100		30.6918	6.20215	99.9224
		30.7668	0.863371	100.006		30.7418	6.20218	99.9228
		30.821	0.863383	100.008		30.796	6.20212	99.9218
		30.8752	0.863302	99.9981		30.8502	6.20214	99.9222
		30.9252	0.863251	99.9922		30.9002	6.20219	99.9231
		30.9752	0.8633	99.9979		30.9502	6.20218	99.9228
		31.0293	0.863258	99.993		31.0043	6.20216	99.9225
		31.0835	0.863229	99.9897		31.0585	6.20211	99.9217
		31.1335	0.863299	99.9979		31.1085	6.20209	99.9215
		31.1877	0.863278	99.9953		31.1627	6.20214	99.9222
		31.2418	0.863312	99.9993		31.2168	6.20212	99.922
		31.2918	0.863333	100.002		31.2668	6.20213	99.922
		31.346	0.86332	100		31.321	6.20212	99.9219
		31.4002	0.863306	99.9986		31.3752	6.20207	99.9211
		31.4502	0.863288	99.9966		31.4252	6.20205	99.9209
		31.5043	0.863354	100.004		31.4793	6.20204	99.9206
		31.5585	0.863368	100.006		31.5335	6.20205	99.9208
		31.6085	0.863326	100.001		31.5835	6.20204	99.9206
		31.6627	0.863283	99.996		31.6377	6.20207	99.9211
		31.7168	0.86324	99.991		31.6918	6.20209	99.9214
		31.7668	0.863291	99.9968		31.7418	6.20205	99.9208
		31.821	0.863301	99.998		31.796	6.20204	99.9207
		31.8752	0.863309	99.999		31.8502	6.20204	99.9206
		31.9252	0.86332	100		31.9002	6.20206	99.921
		31.9752	0.863311	99.9992		31.9543	6.20209	99.9214
		32.0293	0.86335	100.004		32.0085	6.20206	99.9209
		32.0835	0.86332	100		32.0585	6.20207	99.9211
		32.1335	0.863299	99.9979		32.1127	6.20206	99.9209
		32.1877	0.863325	100.001		32.1668	6.20197	99.9194
		32.2418	0.863309	99.9989		32.2168	6.20192	99.9187
		32.2918	0.863313	99.9995		32.271	6.20196	99.9193
		32.346	0.863268	99.9943		32.3252	6.20198	99.9196
		32.4002	0.863285	99.9962		32.3752	6.20201	99.9201
		32.4502	0.863271	99.9945		32.4252	6.20206	99.9209
		32.5043	0.863286	99.9963		32.4793	6.20203	99.9204
		32.5585	0.863342	100.003		32.5335	6.20199	99.9198
		32.6085	0.863394	100.009		32.5835	6.20195	99.9191
		32.6627	0.863348	100.004		32.6377	6.20194	99.9191
		32.7168	0.863329	100.001		32.6918	6.20197	99.9195
		32.7668	0.863352	100.004		32.7418	6.202	99.92
		32.821	0.863363	100.005		32.796	6.20196	99.9194
		32.8752	0.863371	100.006		32.8502	6.20191	99.9186
		32.9252	0.863326	100.001		32.9002	6.20192	99.9186
		32.9752	0.863376	100.007		32.9543	6.20188	99.918
		33.0293	0.863341	100.003		33.0085	6.2019	99.9184
		33.0835	0.863299	99.9978		33.0585	6.20193	99.9188
		33.1335	0.863328	100.001		33.1127	6.20193	99.9188
		33.1877	0.863367	100.006		33.1668	6.20196	99.9194
		33.2418	0.863335	100.002		33.2168	6.20193	99.9188
		33.2918	0.863325	100.001		33.271	6.20194	99.9191
		33.346	0.863348	100.003		33.3252	6.20194	99.919
		33.4002	0.863308	99.9989		33.3752	6.20188	99.918
		33.4502	0.863299	99.9978		33.4293	6.20191	99.9186
		33.5043	0.863328	100.001		33.4835	6.20191	99.9186
		33.5585	0.863359	100.005		33.5335	6.20192	99.9187
		33.6085	0.863304	99.9984		33.5877	6.20193	99.9189
		33.6627	0.863298	99.9977		33.6418	6.2019	99.9183
		33.7168	0.863244	99.9915		33.6918	6.20187	99.9179
		33.7668	0.863239	99.9909		33.746	6.20188	99.918
		33.821	0.863296	99.9974		33.8002	6.20186	99.9178
		33.8752	0.863302	99.9981		33.8502	6.20187	99.9179
		33.9252	0.863278	99.9954		33.9002	6.2019	99.9183
		33.9752	0.863345	100.003		33.9543	6.20186	99.9177
		34.0293	0.863336	100.002		34.0085	6.20181	99.9169
		34.0835	0.863322	100		34.0585	6.20183	99.9172
		34.1335	0.863331	100.001		34.1127	6.20186	99.9177
		34.1877	0.863313	99.9994		34.1668	6.20182	99.9171
		34.2418	0.863267	99.9941		34.2168	6.20178	99.9164
		34.2918	0.863242	99.9912		34.271	6.20181	99.9169
		34.346	0.863248	99.9919		34.3252	6.20173	99.9156
		34.4002	0.86335	100.004		34.3752	6.20173	99.9156
		34.4502	0.863365	100.005		34.4293	6.20178	99.9165
		34.5043	0.863321	100		34.4835	6.2018	99.9168
		34.5585	0.863289	99.9966		34.5335	6.20177	99.9162
		34.6085	0.863264	99.9938		34.5877	6.20172	99.9155
		34.6627	0.863252	99.9924		34.6418	6.20167	99.9147
		34.7168	0.863206	99.987		34.6918	6.20163	99.914
		34.7668	0.863241	99.9911		34.746	6.20167	99.9147
		34.821	0.863247	99.9918		34.8002	6.20171	99.9154
		34.8752	0.863246	99.9917		34.8502	6.20172	99.9154
		34.9252	0.863263	99.9936		34.9043	6.20176	99.9162
		34.9752	0.863343	100.003		34.9585	6.20179	99.9166
		35.0293	0.863303	99.9983		35.0085	6.20179	99.9166
		35.0835	0.863249	99.992		35.0627	6.20168	99.9149
		35.1335	0.863224	99.9891		35.1168	6.20167	99.9147
		35.1877	0.863254	99.9926		35.1668	6.20174	99.9159
		35.2418	0.863219	99.9885		35.221	6.20172	99.9155
		35.2918	0.863255	99.9927		35.2752	6.20167	99.9146
		35.346	0.863314	99.9995		35.3252	6.20162	99.9138
		35.4002	0.863341	100.003		35.3752	6.20167	99.9146
		35.4502	0.863345	100.003		35.4293	6.20175	99.916
		35.5043	0.863287	99.9965		35.4835	6.20171	99.9154
		35.5585	0.863283	99.996		35.5335	6.20165	99.9144
		35.6085	0.8633	99.998		35.5877	6.20163	99.914
		35.6627	0.863266	99.994		35.6418	6.20158	99.9132
		35.7168	0.863252	99.9924		35.6918	6.20157	99.9131
		35.7668	0.863213	99.9879		35.746	6.2016	99.9135
		35.821	0.863229	99.9897		35.8002	6.20159	99.9134
		35.8752	0.863283	99.9959		35.8502	6.20152	99.9123
		35.9252	0.863287	99.9965		35.9043	6.20151	99.9121
		35.9752	0.863262	99.9935		35.9585	6.20159	99.9134
		36.0293	0.863276	99.9952		36.0085	6.20154	99.9125
		36.0835	0.863251	99.9922		36.0627	6.20155	99.9127
		36.1335	0.86324	99.991		36.1168	6.20155	99.9127
		36.1877	0.863285	99.9962		36.1668	6.20157	99.913
		36.2418	0.863338	100.002		36.221	6.20155	99.9127
		36.2918	0.863345	100.003		36.2752	6.20155	99.9127
		36.346	0.863293	99.9971		36.3252	6.20157	99.9131
		36.4002	0.863307	99.9987		36.3793	6.20151	99.9121
		36.4502	0.863293	99.9971		36.4335	6.20146	99.9114
		36.5043	0.863301	99.998		36.4835	6.20146	99.9113
		36.5585	0.863298	99.9976		36.5377	6.20148	99.9117
		36.6085	0.863249	99.992		36.5918	6.20157	99.913
		36.6627	0.863266	99.994		36.6418	6.20155	99.9127
		36.7168	0.863283	99.996		36.696	6.20148	99.9115
		36.7668	0.863312	99.9993		36.7502	6.20152	99.9122
		36.821	0.863274	99.9949		36.8002	6.20157	99.913
		36.8752	0.863228	99.9896		36.8502	6.20152	99.9122
		36.9252	0.863258	99.9931		36.9043	6.20148	99.9116
		36.9752	0.863236	99.9905		36.9585	6.20152	99.9123
		37.0293	0.863247	99.9918		37.0085	6.20148	99.9116
		37.0835	0.863323	100.001		37.0627	6.20143	99.9109
		37.1335	0.86336	100.005		37.1168	6.20144	99.911
		37.1877	0.863332	100.002		37.1668	6.20148	99.9115
		37.2418	0.863345	100.003		37.221	6.20151	99.9121
		37.2918	0.863307	99.9988		37.2752	6.20148	99.9116
		37.346	0.863206	99.9871		37.3252	6.20139	99.9101
		37.4002	0.863244	99.9915		37.3793	6.20144	99.9109
		37.4502	0.863289	99.9966		37.4335	6.2015	99.912
		37.5043	0.863275	99.995		37.4835	6.20145	99.9111
		37.5585	0.863261	99.9935		37.5377	6.20143	99.9108
		37.6085	0.863274	99.9949		37.5918	6.2014	99.9103
		37.6627	0.863297	99.9975		37.6418	6.20135	99.9095
		37.7168	0.863316	99.9997		37.696	6.20145	99.9111
		37.7668	0.863278	99.9953		37.7502	6.20138	99.91
		37.821	0.863283	99.9959		37.8002	6.20134	99.9093
		37.8752	0.863291	99.9968		37.8543	6.20136	99.9097
		37.9252	0.863265	99.9939		37.9085	6.20143	99.9108
		37.9752	0.863353	100.004		37.9585	6.20144	99.911
		38.0293	0.863365	100.005		38.0127	6.20146	99.9112
		38.0835	0.863275	99.995		38.0668	6.20144	99.9109
		38.1335	0.863278	99.9954		38.1168	6.20142	99.9106
		38.1877	0.863277	99.9952		38.171	6.20136	99.9097
		38.2418	0.863225	99.9893		38.2252	6.20136	99.9096
		38.2918	0.863224	99.9891		38.2752	6.20144	99.911
		38.346	0.863246	99.9917		38.3252	6.20147	99.9114
		38.4002	0.863274	99.995		38.3793	6.20139	99.9101
		38.4502	0.863275	99.995		38.4335	6.20137	99.9099
		38.5043	0.863301	99.9981		38.4835	6.20137	99.9098
		38.5585	0.863323	100.001		38.5377	6.20134	99.9093
		38.6085	0.863284	99.9961		38.5918	6.20132	99.909
		38.6627	0.86322	99.9886		38.6418	6.2014	99.9103
		38.7168	0.863252	99.9924		38.696	6.2014	99.9102
		38.7668	0.863259	99.9932		38.7502	6.20129	99.9085
		38.821	0.863253	99.9925		38.8002	6.2013	99.9087
		38.8752	0.86329	99.9967		38.8543	6.20134	99.9093
		38.9252	0.863291	99.9969		38.9085	6.20128	99.9084
		38.9752	0.863253	99.9925		38.9585	6.20127	99.9082
		39.0293	0.863224	99.9892		39.0127	6.20128	99.9083
		39.0835	0.863229	99.9897		39.0668	6.20125	99.9079
		39.1335	0.863324	100.001		39.1168	6.20126	99.9081
		39.1877	0.863313	99.9994		39.171	6.20131	99.9089
		39.2418	0.863262	99.9936		39.2252	6.20124	99.9078
		39.2918	0.863329	100.001		39.2752	6.20131	99.9088
		39.346	0.863354	100.004		39.3293	6.20136	99.9097
		39.4002	0.863279	99.9955		39.3835	6.20131	99.9088
		39.4502	0.863268	99.9942		39.4335	6.20131	99.9089
		39.5043	0.86328	99.9956		39.4877	6.20129	99.9085
		39.5585	0.863283	99.996		39.5418	6.2013	99.9086
		39.6085	0.863327	100.001		39.5918	6.20136	99.9096
		39.6627	0.863314	99.9995		39.646	6.20132	99.9091
		39.7168	0.86331	99.9991		39.7002	6.20132	99.9091
		39.7668	0.863293	99.9972		39.7502	6.20129	99.9086
		39.821	0.863253	99.9925		39.8002	6.20133	99.9092
		39.8752	0.863293	99.9971		39.8543	6.20127	99.9082
		39.9252	0.86322	99.9887		39.9085	6.20123	99.9076
		39.9752	0.863181	99.9842		39.9585	6.20117	99.9066
		40.0293	0.863238	99.9907		40.0127	6.20119	99.9069
		40.0835	0.86322	99.9886		40.0668	6.20123	99.9076
		40.1335	0.863221	99.9888		40.1168	6.2012	99.907
		40.1877	0.863272	99.9947		40.171	6.20116	99.9064
		40.2418	0.863315	99.9997		40.2252	6.20108	99.9052
		40.2918	0.863318	100		40.2752	6.20101	99.904
		40.346	0.863325	100.001		40.3293	6.20108	99.9052
		40.4002	0.863323	100.001		40.3835	6.20111	99.9057
		40.4502	0.863265	99.9939		40.4335	6.20118	99.9068
		40.5043	0.863257	99.993		40.4877	6.20109	99.9053
		40.5585	0.863354	100.004		40.5418	6.20102	99.9042
		40.6085	0.863287	99.9965		40.5918	6.20107	99.905
		40.6627	0.863245	99.9916		40.646	6.2011	99.9055
		40.7168	0.863323	100.001		40.7002	6.20113	99.906
		40.7668	0.863348	100.003		40.7502	6.20113	99.906
		40.821	0.863301	99.9981		40.8043	6.20116	99.9065
		40.8752	0.863272	99.9947		40.8585	6.20114	99.9061
		40.9252	0.863236	99.9905		40.9085	6.20108	99.9052
		40.9752	0.863281	99.9957		40.9627	6.20105	99.9047
		41.0293	0.863257	99.993		41.0168	6.20106	99.9049
		41.0835	0.863229	99.9897		41.0668	6.20108	99.9051
		41.1335	0.86329	99.9967		41.121	6.2011	99.9055
		41.1877	0.863258	99.9931		41.1752	6.20104	99.9044
		41.2418	0.863253	99.9925		41.2252	6.20107	99.905
		41.2918	0.863236	99.9905		41.2752	6.20108	99.9051
		41.346	0.863243	99.9913		41.3293	6.20104	99.9045
		41.4002	0.863224	99.9891		41.3835	6.201	99.9039
		41.4502	0.86324	99.991		41.4335	6.20099	99.9037
		41.5043	0.863279	99.9955		41.4877	6.20106	99.9049
		41.5585	0.863243	99.9913		41.5418	6.20109	99.9053
		41.6085	0.863252	99.9924		41.5918	6.20102	99.9042
		41.6627	0.86327	99.9944		41.646	6.20096	99.9033
		41.7168	0.863224	99.9892		41.7002	6.20095	99.9031
		41.7668	0.863225	99.9893		41.7502	6.20092	99.9026
		41.821	0.863278	99.9954		41.8043	6.20087	99.9017
		41.8752	0.863265	99.9938		41.8585	6.20098	99.9035
		41.9252	0.863241	99.9911		41.9085	6.20105	99.9047
		41.9752	0.863273	99.9948		41.9627	6.20103	99.9043
		42.0293	0.863222	99.9889		42.0168	6.20096	99.9033
		42.0835	0.863229	99.9897		42.0668	6.20092	99.9026
		42.1335	0.863221	99.9888		42.121	6.20092	99.9026
		42.1877	0.863223	99.9891		42.1752	6.2009	99.9022
		42.2418	0.863246	99.9917		42.2252	6.20086	99.9017
		42.2918	0.863179	99.9839		42.2793	6.20087	99.9017
		42.346	0.863209	99.9874		42.3335	6.20081	99.9008
		42.4002	0.863227	99.9894		42.3835	6.20082	99.9009
		42.4502	0.863189	99.9851		42.4377	6.2009	99.9022
		42.5043	0.863266	99.994		42.4918	6.20092	99.9025
		42.5585	0.863236	99.9905		42.5418	6.20086	99.9016
		42.6085	0.863217	99.9883		42.596	6.2009	99.9023
		42.6627	0.863223	99.989		42.6502	6.20096	99.9032
		42.7168	0.863264	99.9938		42.7002	6.20088	99.9019
		42.7668	0.863304	99.9983		42.7502	6.20079	99.9005
		42.821	0.863281	99.9957		42.8043	6.20086	99.9015
		42.8752	0.863318	100		42.8585	6.20091	99.9025
		42.9252	0.863351	100.004		42.9085	6.20087	99.9017
		42.9752	0.863286	99.9963		42.9627	6.20082	99.901
		43.0293	0.863284	99.9961		43.0168	6.20081	99.9008
		43.0835	0.863274	99.9949		43.0668	6.20077	99.9002
		43.1335	0.863303	99.9982		43.121	6.20079	99.9005
		43.1877	0.863344	100.003		43.1752	6.2008	99.9007
		43.2418	0.863298	99.9977		43.2252	6.20078	99.9004
		43.2918	0.863318	100		43.2793	6.20083	99.9012
		43.346	0.863255	99.9927		43.3335	6.20089	99.9022
		43.4002	0.863158	99.9815		43.3835	6.20083	99.901
		43.4502	0.863204	99.9868		43.4377	6.2008	99.9006
		43.5043	0.86324	99.991		43.4918	6.20082	99.901
		43.5585	0.863258	99.9931		43.5418	6.20089	99.9021
		43.6085	0.863273	99.9948		43.596	6.20089	99.9021
		43.6627	0.863247	99.9918		43.6502	6.20081	99.9008
		43.7168	0.863306	99.9986		43.7002	6.20079	99.9005
		43.7668	0.863295	99.9973		43.7543	6.2008	99.9006
		43.821	0.863246	99.9917		43.8085	6.20087	99.9018
		43.8752	0.86325	99.9922		43.8585	6.20082	99.9009
		43.9252	0.863226	99.9893		43.9127	6.20075	99.8998
		43.9752	0.863197	99.986		43.9668	6.20078	99.9004
		44.0293	0.863209	99.9874		44.0168	6.20074	99.8997
		44.0835	0.86319	99.9851		44.071	6.20072	99.8993
		44.1335	0.863241	99.9911		44.1252	6.20071	99.8991
		44.1877	0.863224	99.9891		44.1752	6.2007	99.8991
		44.2418	0.863213	99.9878		44.2252	6.20067	99.8986
		44.2918	0.863271	99.9946		44.2793	6.20069	99.8988
		44.346	0.863245	99.9916		44.3335	6.20069	99.8989
		44.4002	0.863179	99.984		44.3835	6.20072	99.8994
		44.4502	0.863206	99.9871		44.4377	6.20069	99.8988
		44.5043	0.863252	99.9924		44.4918	6.20065	99.8982
		44.5585	0.863221	99.9888		44.5418	6.20066	99.8984
		44.6085	0.863225	99.9892		44.596	6.20061	99.8975
		44.6627	0.863221	99.9887		44.6502	6.20067	99.8986
		44.7168	0.863214	99.988		44.7002	6.2007	99.8991
		44.7668	0.863231	99.9899		44.7543	6.20069	99.8988
		44.821	0.863263	99.9936		44.8085	6.20064	99.8981
		44.8752	0.863231	99.99		44.8585	6.2006	99.8974
		44.9252	0.863204	99.9868		44.9127	6.20059	99.8973
		44.9752	0.863213	99.9879		44.9668	6.20059	99.8973
		45.0293	0.863205	99.9869		45.0168	6.2006	99.8974
		45.0835	0.863236	99.9905		45.071	6.20063	99.8979
		45.1335	0.863215	99.988		45.1252	6.20062	99.8977
		45.1877	0.863171	99.983		45.1752	6.20051	99.896
		45.2418	0.863236	99.9905		45.2293	6.2005	99.8958
		45.2918	0.863257	99.9929		45.2835	6.20062	99.8977
		45.346	0.863245	99.9916		45.3335	6.20059	99.8973
		45.4002	0.863213	99.9878		45.3877	6.20055	99.8966
		45.4502	0.863234	99.9902		45.4418	6.20049	99.8957
		45.5043	0.863235	99.9904		45.4918	6.20053	99.8963
		45.5585	0.86321	99.9875		45.546	6.20064	99.898
		45.6085	0.863164	99.9822		45.6002	6.20052	99.8961
		45.6627	0.863171	99.983		45.6502	6.20047	99.8953
		45.7168	0.863213	99.9879		45.7002	6.20054	99.8964
		45.7668	0.863207	99.9872		45.7543	6.20061	99.8975
		45.821	0.863228	99.9896		45.8085	6.20054	99.8964
		45.8752	0.862846	99.9454		45.8585	6.20051	99.896
		45.9252	0.862484	99.9034		45.9127	6.20046	99.8952
		45.9752	0.863094	99.9741		45.9668	6.20048	99.8955
		46.0293	0.863167	99.9825		46.0168	6.20051	99.8959
		46.0835	0.863146	99.9801		46.071	6.2005	99.8959
		46.1335	0.863239	99.9909		46.1252	6.2005	99.8957
		46.1877	0.863198	99.9861		46.1752	6.20046	99.8952
		46.2418	0.863173	99.9832		46.2293	6.20044	99.8949
		46.2918	0.863227	99.9894		46.2835	6.20048	99.8955
		46.346	0.863269	99.9943		46.3335	6.20047	99.8953
		46.4002	0.863239	99.9909		46.3877	6.20047	99.8953
		46.4502	0.863185	99.9846		46.4418	6.20048	99.8954
		46.5043	0.863199	99.9862		46.4918	6.20048	99.8956
		46.5585	0.863187	99.9849		46.546	6.20047	99.8953
		46.6085	0.863198	99.9861		46.6002	6.20042	99.8945
		46.6627	0.863205	99.9869		46.6502	6.20043	99.8947
		46.7168	0.863194	99.9856		46.7043	6.2004	99.8941
		46.7668	0.863272	99.9947		46.7585	6.20042	99.8945
		46.821	0.863327	100.001		46.8085	6.20043	99.8947
		46.8752	0.863293	99.9971		46.8627	6.20047	99.8953
		46.9252	0.863289	99.9967		46.9168	6.20048	99.8955
		46.9752	0.863291	99.9969		46.9668	6.20046	99.8951
		47.0293	0.863228	99.9896		47.021	6.20042	99.8945
		47.0835	0.86326	99.9933		47.0752	6.2003	99.8925
		47.1335	0.863236	99.9905		47.1252	6.20036	99.8936
		47.1877	0.863257	99.9929		47.1752	6.20041	99.8944
		47.2418	0.863285	99.9962		47.2293	6.20045	99.8949
		47.2918	0.863232	99.99		47.2835	6.20039	99.894
		47.346	0.863257	99.9929		47.3335	6.20032	99.893
		47.4002	0.863212	99.9877		47.3877	6.20037	99.8938
		47.4502	0.863157	99.9814		47.4418	6.20038	99.8939
		47.5043	0.863216	99.9882		47.4918	6.2003	99.8926
		47.5585	0.863215	99.9881		47.546	6.20035	99.8933
		47.6085	0.863199	99.9862		47.6002	6.20041	99.8943
		47.6627	0.863213	99.9878		47.6502	6.20042	99.8945
		47.7168	0.863216	99.9882		47.7043	6.20039	99.894
		47.7668	0.863254	99.9926		47.7585	6.20034	99.8933
		47.821	0.863246	99.9917		47.8085	6.20029	99.8925
		47.8752	0.863232	99.9901		47.8627	6.20029	99.8924
		47.9252	0.863282	99.9959		47.9168	6.20033	99.8931
		47.9752	0.863281	99.9957		47.9668	6.20032	99.8929
		48.0293	0.863213	99.9879		48.021	6.20041	99.8943
		48.0835	0.86315	99.9805		48.0752	6.20038	99.8938
		48.1335	0.863169	99.9827		48.1252	6.20026	99.8919
		48.1877	0.863206	99.987		48.1793	6.20022	99.8913
		48.2418	0.863202	99.9865		48.2335	6.20032	99.893
		48.2918	0.863204	99.9868		48.2835	6.20039	99.894
		48.346	0.863215	99.9881		48.3377	6.20036	99.8936
		48.4002	0.863239	99.9909		48.3918	6.20035	99.8934
		48.4502	0.863248	99.9919		48.4418	6.20025	99.8918
		48.5043	0.863258	99.9931		48.496	6.20023	99.8914
		48.5585	0.863254	99.9926		48.5502	6.20026	99.8919
		48.6085	0.863217	99.9883		48.6002	6.20024	99.8916
		48.6627	0.863258	99.9931		48.6502	6.20022	99.8913
		48.7168	0.863224	99.9891		48.7043	6.20017	99.8905
		48.7668	0.863201	99.9865		48.7585	6.20016	99.8903
		48.821	0.863177	99.9836		48.8085	6.20017	99.8906
		48.8752	0.863164	99.9822		48.8627	6.20017	99.8905
		48.9252	0.863142	99.9796		48.9168	6.20021	99.8911
		48.9752	0.863179	99.9839		48.9668	6.20023	99.8914
		49.0293	0.863253	99.9925		49.021	6.20021	99.8912
		49.0835	0.863253	99.9925		49.0752	6.20015	99.8901
		49.1335	0.863174	99.9834		49.1252	6.20014	99.89
		49.1877	0.863196	99.9858		49.1793	6.20016	99.8903
		49.2418	0.86333	100.001		49.2335	6.20015	99.8902
		49.2918	0.863364	100.005		49.2835	6.20019	99.8908
		49.346	0.863303	99.9983		49.3377	6.20015	99.8902
		49.4002	0.863245	99.9916		49.3918	6.20017	99.8904
		49.4502	0.863227	99.9894		49.4418	6.20023	99.8915
		49.5043	0.863193	99.9855		49.496	6.20016	99.8903
		49.5585	0.863267	99.9942		49.5502	6.20015	99.8902
		49.6085	0.863306	99.9986		49.6002	6.2002	99.891
		49.6627	0.863254	99.9925		49.6543	6.20015	99.8902
		49.7168	0.863166	99.9824		49.7085	6.2001	99.8894
		49.7668	0.863207	99.9872		49.7585	6.20018	99.8907
		49.821	0.863229	99.9897		49.8127	6.20021	99.8911
		49.8752	0.863191	99.9853		49.8668	6.20011	99.8896
		49.9252	0.863188	99.9849		49.9168	6.20009	99.8891
		49.9752	0.863213	99.9879		49.971	6.20009	99.8893
		50.0293	0.863216	99.9881		50.0252	6.20006	99.8888
		50.0835	0.862954	99.9578		50.0752	6.20012	99.8897
		50.1335	0.86303	99.9666		50.1252	6.20016	99.8903
		50.1877	0.863232	99.99		50.1793	6.20007	99.8889
		50.2418	0.863234	99.9903		50.2335	6.20002	99.8881
		50.2918	0.863186	99.9847		50.2835	6.20005	99.8886
		50.346	0.8632	99.9863		50.3377	6.20007	99.8889
		50.4002	0.863231	99.9899		50.3918	6.20002	99.8881
		50.4502	0.863255	99.9927		50.4418	6.20004	99.8884
		50.5043	0.863259	99.9932		50.496	6.20017	99.8905
		50.5585	0.863206	99.987		50.5502	6.20014	99.89
		50.6085	0.863187	99.9848		50.6002	6.20004	99.8884
		50.6627	0.863221	99.9888		50.6543	6.2	99.8877
		50.7168	0.863245	99.9916		50.7085	6.20004	99.8884
		50.7668	0.863293	99.9972		50.7585	6.20007	99.8888
		50.821	0.86332	100		50.8127	6.20008	99.889
		50.8752	0.863258	99.993		50.8668	6.20007	99.8889
		50.9252	0.863236	99.9905		50.9168	6.20005	99.8885
		50.9752	0.863241	99.9911		50.971	6.20002	99.8881
		51.0293	0.863226	99.9893		51.0252	6.19996	99.8871
		51.0835	0.863263	99.9936		51.0752	6.19998	99.8875
		51.1335	0.863273	99.9948		51.1293	6.20001	99.8879
		51.1877	0.863233	99.9901		51.1835	6.20002	99.888
		51.2418	0.863237	99.9906		51.2335	6.19996	99.8871
		51.2918	0.863216	99.9882		51.2877	6.2	99.8878
		51.346	0.863236	99.9905		51.3418	6.20003	99.8883
		51.4002	0.863211	99.9876		51.3918	6.20002	99.8881
		51.4502	0.863216	99.9882		51.446	6.20009	99.8892
		51.5043	0.863183	99.9844		51.5002	6.20006	99.8887
		51.5585	0.863225	99.9893		51.5502	6.20005	99.8885
		51.6085	0.863296	99.9974		51.6002	6.20005	99.8886
		51.6627	0.863241	99.9911		51.6543	6.20001	99.8879
		51.7168	0.863211	99.9876		51.7085	6.19997	99.8873
		51.7668	0.863211	99.9877		51.7585	6.19998	99.8874
		51.821	0.863222	99.9889		51.8127	6.19996	99.8871
		51.8752	0.86324	99.991		51.8668	6.19997	99.8873
		51.9252	0.863225	99.9892		51.9168	6.20003	99.8882
		51.9752	0.863285	99.9962		51.971	6.20001	99.888
		52.0293	0.863287	99.9964		52.0252	6.20004	99.8884
		52.0835	0.86327	99.9945		52.0752	6.20002	99.888
		52.1335	0.863267	99.9942		52.1293	6.19995	99.8869
		52.1877	0.863234	99.9902		52.1835	6.19991	99.8863
		52.2418	0.86321	99.9875		52.2335	6.19991	99.8864
		52.2918	0.863246	99.9917		52.2877	6.19986	99.8856
		52.346	0.863255	99.9927		52.3418	6.19988	99.8858
		52.4002	0.863255	99.9927		52.3918	6.19992	99.8865
		52.4502	0.863241	99.9911		52.446	6.19991	99.8863
		52.5043	0.863261	99.9934		52.5002	6.19983	99.885
		52.5585	0.863316	99.9997		52.5502	6.19983	99.885
		52.6085	0.863267	99.9941		52.6043	6.19989	99.886
		52.6627	0.863257	99.993		52.6585	6.19988	99.8858
		52.7168	0.863239	99.9909		52.7085	6.19993	99.8865
		52.7668	0.863194	99.9857		52.7627	6.19989	99.886
		52.821	0.863218	99.9885		52.8168	6.19991	99.8864
		52.8752	0.863054	99.9694		52.8668	6.19993	99.8867
		52.9252	0.863056	99.9697		52.921	6.19987	99.8857
		52.9752	0.863223	99.989		52.9752	6.19983	99.885
		53.0293	0.863231	99.9899		53.0252	6.1999	99.8861
		53.0835	0.863221	99.9888		53.0752	6.1999	99.8862
		53.1335	0.863187	99.9848		53.1293	6.19986	99.8854
		53.1877	0.863178	99.9838		53.1835	6.19984	99.8852
		53.2418	0.863239	99.9909		53.2335	6.19985	99.8853
		53.2918	0.863223	99.989		53.2877	6.19989	99.8859
		53.346	0.863203	99.9867		53.3418	6.19984	99.8852
		53.4002	0.863111	99.976		53.3918	6.19987	99.8856
		53.4502	0.86314	99.9794		53.446	6.19988	99.8858
		53.5043	0.86317	99.9829		53.5002	6.19986	99.8855
		53.5585	0.862753	99.9346		53.5502	6.19981	99.8847
		53.6085	0.862829	99.9434		53.6043	6.19985	99.8853
		53.6627	0.863028	99.9664		53.6585	6.19989	99.8859
		53.7168	0.862963	99.9589		53.7085	6.19991	99.8864
		53.7668	0.863108	99.9757		53.7627	6.19982	99.8849
		53.821	0.863236	99.9905		53.8168	6.19974	99.8836
		53.8752	0.863259	99.9932		53.8668	6.19976	99.8838
		53.9252	0.863205	99.987		53.921	6.19984	99.8852
		53.9752	0.863267	99.9941		53.9752	6.1998	99.8845
		54.0293	0.863259	99.9932		54.0252	6.19979	99.8844
		54.0835	0.863193	99.9855		54.0793	6.19981	99.8847
		54.1335	0.863255	99.9927		54.1335	6.19978	99.8842
		54.1877	0.863249	99.992		54.1835	6.19979	99.8844
		54.2418	0.863229	99.9897		54.2377	6.19982	99.8848
		54.2918	0.863203	99.9867		54.2918	6.19981	99.8848
		54.346	0.863195	99.9858		54.3418	6.19974	99.8836
		54.4002	0.863215	99.9881		54.396	6.19965	99.8821
		54.4502	0.86323	99.9898		54.4502	6.19962	99.8816
		54.5043	0.863194	99.9856		54.5002	6.19959	99.8811
		54.5585	0.863159	99.9817		54.5502	6.19964	99.882
		54.6085	0.863157	99.9814		54.6043	6.19967	99.8824
		54.6627	0.86316	99.9817		54.6585	6.19973	99.8834
		54.7168	0.863106	99.9755		54.7085	6.19973	99.8835
		54.7668	0.8632	99.9864		54.7627	6.1997	99.883
		54.821	0.863245	99.9916		54.8168	6.19961	99.8815
		54.8752	0.863197	99.986		54.8668	6.19965	99.8821
		54.9252	0.863255	99.9928		54.921	6.19974	99.8836
		54.9752	0.863259	99.9931		54.9752	6.19968	99.8826
		55.0293	0.863305	99.9985		55.0252	6.19964	99.8819
		55.0835	0.863235	99.9904		55.0793	6.19962	99.8816
		55.1335	0.863104	99.9752		55.1335	6.19961	99.8815
		55.1877	0.863147	99.9803		55.1835	6.19961	99.8815
		55.2418	0.86317	99.9829		55.2377	6.19961	99.8815
		55.2918	0.863216	99.9882		55.2918	6.19965	99.8821
		55.346	0.863257	99.993		55.3418	6.19966	99.8823
		55.4002	0.863205	99.9869		55.396	6.19964	99.882
		55.4502	0.863179	99.9839		55.4502	6.19962	99.8817
		55.5043	0.863184	99.9845		55.5002	6.1996	99.8813
		55.5585	0.863185	99.9846		55.5543	6.19957	99.8808
		55.6085	0.863162	99.982		55.6085	6.19959	99.8811
		55.6627	0.863197	99.986		55.6585	6.19963	99.8818
		55.7168	0.863186	99.9847		55.7127	6.19966	99.8823
		55.7668	0.863208	99.9873		55.7668	6.19971	99.883
		55.821	0.86317	99.9829		55.8168	6.19971	99.8831
		55.8752	0.863172	99.9831		55.871	6.19958	99.8811
		55.9252	0.863194	99.9856		55.9252	6.19957	99.8808
		55.9752	0.863176	99.9836		55.9752	6.19963	99.8818
		56.0293	0.863236	99.9905		56.0252	6.19962	99.8816
		56.0835	0.863295	99.9974		56.0793	6.19959	99.8811
		56.1335	0.863185	99.9846		56.1335	6.19957	99.8808
		56.1877	0.863145	99.98		56.1835	6.19949	99.8796
		56.2418	0.863224	99.9891		56.2377	6.19953	99.8802
		56.2918	0.863202	99.9866		56.2918	6.19957	99.8808
		56.346	0.863198	99.9861		56.3418	6.19957	99.8808
		56.4002	0.863213	99.9878		56.396	6.19958	99.8811
		56.4502	0.86324	99.9909		56.4502	6.19953	99.8802
		56.5043	0.863199	99.9862		56.5002	6.1995	99.8797
		56.5585	0.863199	99.9862		56.5543	6.19949	99.8795
		56.6085	0.863208	99.9872		56.6085	6.19951	99.8798
		56.6627	0.863208	99.9873		56.6585	6.19946	99.8791
		56.7168	0.863174	99.9834		56.7127	6.19944	99.8788
		56.7668	0.863223	99.9889		56.7668	6.19944	99.8788
		56.821	0.86324	99.991		56.8168	6.19948	99.8793
		56.8752	0.863179	99.9839		56.871	6.19956	99.8806
		56.9252	0.863192	99.9854		56.9252	6.19955	99.8805
		56.9752	0.86317	99.9828		56.9752	6.19954	99.8803
		57.0293	0.863205	99.9869		57.0293	6.19954	99.8803
		57.0835	0.8632	99.9863		57.0835	6.19946	99.8791
		57.1335	0.86319	99.9852		57.1335	6.19943	99.8785
		57.1877	0.863173	99.9833		57.1877	6.19946	99.8791
		57.2418	0.86317	99.9828		57.2418	6.19946	99.8791
		57.2918	0.863213	99.9878		57.2918	6.19945	99.8789
		57.346	0.863179	99.9839		57.346	6.19944	99.8787
		57.4002	0.863232	99.9901		57.4002	6.19946	99.879
		57.4502	0.863261	99.9934		57.4502	6.1995	99.8797
		57.5043	0.863255	99.9927		57.5002	6.19945	99.8789
		57.5585	0.863226	99.9894		57.5543	6.1994	99.8781
		57.6085	0.863186	99.9847		57.6085	6.19941	99.8782
		57.6627	0.863216	99.9882		57.6585	6.19939	99.878
		57.7168	0.863205	99.987		57.7127	6.19946	99.879
		57.7668	0.863223	99.989		57.7668	6.19944	99.8788
		57.821	0.863239	99.9908		57.8168	6.19942	99.8785
		57.8752	0.86324	99.9909		57.871	6.19942	99.8784
		57.9252	0.863241	99.991		57.9252	6.19938	99.8778
		57.9752	0.863231	99.9899		57.9752	6.19945	99.8789
		58.0293	0.8632	99.9863		58.0293	6.19937	99.8777
		58.0835	0.863173	99.9832		58.0835	6.19929	99.8763
		58.1335	0.863138	99.9791		58.1335	6.19932	99.8768
		58.1877	0.863193	99.9856		58.1877	6.19934	99.8771
		58.2418	0.863202	99.9865		58.2418	6.19938	99.8778
		58.2918	0.863194	99.9856		58.2918	6.19943	99.8785
		58.346	0.863208	99.9873		58.346	6.19944	99.8787
		58.4002	0.863203	99.9867		58.4002	6.1994	99.878
		58.4502	0.863262	99.9935		58.4502	6.19933	99.877
		58.5043	0.863304	99.9984		58.5043	6.1993	99.8765
		58.5585	0.863239	99.9908		58.5585	6.19936	99.8775
		58.6085	0.863206	99.987		58.6085	6.19938	99.8778
		58.6627	0.863209	99.9874		58.6627	6.19932	99.8768
		58.7168	0.863266	99.994		58.7168	6.19929	99.8763
		58.7668	0.863249	99.992		58.7668	6.19934	99.8772
		58.821	0.863229	99.9897		58.821	6.19939	99.8779
		58.8752	0.86325	99.9921		58.8752	6.19934	99.8772
		58.9252	0.863213	99.9879		58.9252	6.19932	99.8767
		58.9752	0.863163	99.9821		58.9752	6.19922	99.8752
		59.0293	0.863168	99.9826		59.0293	6.19923	99.8753
		59.0835	0.863171	99.983		59.0835	6.19928	99.8762
		59.1335	0.86326	99.9933		59.1335	6.1993	99.8765
		59.1877	0.863261	99.9934		59.1877	6.19926	99.8759
		59.2418	0.863212	99.9877		59.2418	6.19921	99.8751
		59.2918	0.863224	99.9892		59.2918	6.1992	99.8749
		59.346	0.863141	99.9795		59.346	6.19921	99.875
		59.4002	0.863156	99.9813		59.4002	6.19922	99.8752
		59.4502	0.863183	99.9844		59.4502	6.19922	99.8752
		59.5043	0.863227	99.9894		59.5043	6.19917	99.8744
		59.5585	0.863196	99.9859		59.5585	6.19919	99.8747
		59.6085	0.863217	99.9883		59.6085	6.19916	99.8742
		59.6627	0.863176	99.9835		59.6627	6.19919	99.8748
		59.7168	0.863229	99.9897		59.7168	6.19916	99.8743
		59.7668	0.863221	99.9888		59.7668	6.19916	99.8743
		59.821	0.863209	99.9874		59.821	6.19913	99.8738
		59.8752	0.863268	99.9942		59.8752	6.19922	99.8752
		59.9252	0.86323	99.9898		59.9252	6.19923	99.8753
		59.9752	0.863186	99.9847		59.9793	6.19915	99.8741
		60.0293	0.863126	99.9778		60.0335	6.19917	99.8743
		60.0835	0.863148	99.9803		60.0835	6.1992	99.8749
		60.1335	0.863224	99.9891		60.1377	6.19912	99.8736
		60.1877	0.8632	99.9864		60.1918	6.1991	99.8732
		60.2418	0.863216	99.9882		60.2418	6.19913	99.8737
		60.2918	0.863202	99.9866		60.296	6.19919	99.8747
		60.346	0.86321	99.9875		60.3502	6.19912	99.8736
		60.4002	0.863281	99.9957		60.4002	6.19913	99.8737
		60.4502	0.863266	99.9939		60.4502	6.19918	99.8746
		60.5043	0.863192	99.9854		60.5043	6.19914	99.874
		60.5585	0.863185	99.9846		60.5585	6.19909	99.8731
		60.6085	0.863198	99.9862		60.6085	6.19906	99.8726
		60.6627	0.863149	99.9805		60.6627	6.19912	99.8736
		60.7168	0.863186	99.9847		60.7168	6.19908	99.873
		60.7668	0.863204	99.9868		60.7668	6.19907	99.8728
		60.821	0.863155	99.9812		60.821	6.19906	99.8726
		60.8752	0.863021	99.9656		60.8752	6.19909	99.8731
		60.9252	0.862402	99.894		60.9252	6.19901	99.8718
		60.9752	0.862634	99.9208		60.9793	6.19904	99.8722
		61.0293	0.863165	99.9823		61.0335	6.19909	99.8731
		61.0835	0.863166	99.9824		61.0835	6.19906	99.8726
		61.1335	0.863148	99.9803		61.1377	6.19903	99.8721
		61.1877	0.863181	99.9841		61.1918	6.19893	99.8704
		61.2418	0.86322	99.9887		61.2418	6.19893	99.8705
		61.2918	0.863209	99.9873		61.296	6.19893	99.8705
		61.346	0.863151	99.9806		61.3502	6.19892	99.8704
		61.4002	0.863192	99.9855		61.4002	6.19897	99.8711
		61.4502	0.863143	99.9797		61.4543	6.19896	99.871
		61.5043	0.863098	99.9745		61.5085	6.19896	99.8711
		61.5585	0.863082	99.9727		61.5585	6.19896	99.871
		61.6085	0.863156	99.9813		61.6127	6.19897	99.8711
		61.6627	0.863165	99.9823		61.6668	6.19897	99.8711
		61.7168	0.863147	99.9803		61.7168	6.19893	99.8705
		61.7668	0.863078	99.9722		61.771	6.19893	99.8706
		61.821	0.863093	99.974		61.8252	6.19889	99.8698
		61.8752	0.863128	99.9779		61.8752	6.19882	99.8688
		61.9252	0.863132	99.9785		61.9252	6.19881	99.8686
		61.9752	0.86316	99.9817		61.9793	6.1989	99.87
		62.0293	0.863201	99.9865		62.0335	6.19888	99.8697
		62.0835	0.863187	99.9849		62.0835	6.19884	99.8691
		62.1335	0.863189	99.985		62.1377	6.19888	99.8697
		62.1877	0.863221	99.9888		62.1918	6.19893	99.8705
		62.2418	0.863142	99.9796		62.2418	6.19896	99.871
		62.2918	0.863152	99.9807		62.296	6.19896	99.871
		62.346	0.863205	99.9869		62.3502	6.19892	99.8704
		62.4002	0.863197	99.986		62.4002	6.19888	99.8696
		62.4502	0.863188	99.9849		62.4543	6.19883	99.8689
		62.5043	0.863146	99.9801		62.5085	6.19884	99.8691
		62.5585	0.863138	99.9792		62.5585	6.19882	99.8687
		62.6085	0.863151	99.9806		62.6127	6.19876	99.8677
		62.6627	0.863113	99.9762		62.6668	6.19874	99.8675
		62.7168	0.863157	99.9813		62.7168	6.19873	99.8674
		62.7668	0.863147	99.9803		62.771	6.19879	99.8682
		62.821	0.863081	99.9726		62.8252	6.19885	99.8692
		62.8752	0.863125	99.9777		62.8752	6.19887	99.8696
		62.9252	0.863153	99.9809		62.9293	6.19883	99.8688
		62.9752	0.863124	99.9776		62.9835	6.19877	99.868
		63.0293	0.863112	99.9761		63.0335	6.19878	99.8681
		63.0835	0.863099	99.9746		63.0877	6.19876	99.8677
		63.1335	0.863156	99.9813		63.1418	6.19881	99.8686
		63.1877	0.863179	99.9839		63.1918	6.19885	99.8692
		63.2418	0.863151	99.9807		63.246	6.19878	99.8681
		63.2918	0.863167	99.9825		63.3002	6.19867	99.8663
		63.346	0.863198	99.9862		63.3502	6.19868	99.8665
		63.4002	0.863165	99.9823		63.4002	6.19873	99.8673
		63.4502	0.863091	99.9737		63.4543	6.19875	99.8676
		63.5043	0.863133	99.9786		63.5085	6.1987	99.8669
		63.5585	0.863124	99.9776		63.5585	6.19865	99.866
		63.6085	0.863177	99.9837		63.6127	6.19867	99.8664
		63.6627	0.863193	99.9856		63.6668	6.19865	99.8659
		63.7168	0.863147	99.9802		63.7168	6.19865	99.866
		63.7668	0.863088	99.9733		63.771	6.1987	99.8669
		63.821	0.863134	99.9787		63.8252	6.19872	99.8672
		63.8752	0.863157	99.9814		63.8752	6.19869	99.8666
		63.9252	0.863187	99.9848		63.9293	6.19868	99.8665
		63.9752	0.863166	99.9824		63.9835	6.1987	99.8667
		64.0293	0.863042	99.968		64.0335	6.19871	99.867
		64.0835	0.863039	99.9677		64.0877	6.19874	99.8674
		64.1335	0.86313	99.9782		64.1418	6.19872	99.8672
		64.1877	0.863089	99.9735		64.1918	6.19868	99.8664
		64.2418	0.863052	99.9692		64.246	6.19866	99.8662
		64.2918	0.862881	99.9494		64.3002	6.19867	99.8664
		64.346	0.862917	99.9535		64.3502	6.19873	99.8673
		64.4002	0.863072	99.9716		64.4043	6.19875	99.8676
		64.4502	0.863109	99.9758		64.4585	6.19875	99.8676
		64.5043	0.863093	99.9739		64.5085	6.19875	99.8676
		64.5585	0.863068	99.9711		64.5627	6.19873	99.8673
		64.6085	0.8631	99.9748		64.6168	6.19868	99.8665
		64.6627	0.863119	99.9769		64.6668	6.19869	99.8666
		64.7168	0.863105	99.9753		64.721	6.19865	99.8661
		64.7668	0.863123	99.9774		64.7752	6.19864	99.8658
		64.821	0.863176	99.9836		64.8252	6.19856	99.8646
		64.8752	0.863195	99.9858		64.8752	6.19855	99.8644
		64.9252	0.86317	99.9828		64.9293	6.19858	99.8649
		64.9752	0.863102	99.975		64.9835	6.19854	99.8642
		65.0293	0.863172	99.9831		65.0335	6.19862	99.8655
		65.0835	0.863138	99.9792		65.0877	6.19859	99.865
		65.1335	0.86309	99.9736		65.1418	6.19856	99.8645
		65.1877	0.863115	99.9765		65.1918	6.19856	99.8646
		65.2418	0.86314	99.9794		65.246	6.19857	99.8647
		65.2918	0.863111	99.9761		65.3002	6.19848	99.8633
		65.346	0.863088	99.9733		65.3502	6.19852	99.8639
		65.4002	0.863123	99.9774		65.4043	6.1986	99.8652
		65.4502	0.863154	99.981		65.4585	6.19859	99.8651
		65.5043	0.863166	99.9825		65.5085	6.1986	99.8652
		65.5585	0.863195	99.9857		65.5627	6.19865	99.8661
		65.6085	0.863138	99.9791		65.6168	6.19861	99.8654
		65.6627	0.863132	99.9784		65.6668	6.19857	99.8648
		65.7168	0.86316	99.9817		65.721	6.19859	99.865
		65.7668	0.863154	99.981		65.7752	6.1986	99.8651
		65.821	0.863164	99.9821		65.8252	6.19853	99.8641
		65.8752	0.863117	99.9768		65.8793	6.19851	99.8638
		65.9252	0.863108	99.9757		65.9335	6.1986	99.8652
		65.9752	0.86313	99.9782		65.9835	6.19856	99.8645
		66.0293	0.863148	99.9803		66.0377	6.1985	99.8636
		66.0835	0.863152	99.9808		66.0918	6.19852	99.8639
		66.1335	0.863155	99.9812		66.1418	6.19858	99.8648
		66.1877	0.863146	99.98		66.196	6.19856	99.8645
		66.2418	0.863146	99.98		66.2502	6.19851	99.8637
		66.2918	0.863147	99.9802		66.3002	6.19853	99.8641
		66.346	0.863166	99.9824		66.3502	6.19854	99.8643
		66.4002	0.863127	99.9779		66.4043	6.19849	99.8635
		66.4502	0.863198	99.9861		66.4585	6.19847	99.8631
		66.5043	0.863225	99.9893		66.5085	6.19859	99.865
		66.5585	0.863181	99.9841		66.5627	6.19857	99.8647
		66.6085	0.863176	99.9835		66.6168	6.19851	99.8638
		66.6627	0.863198	99.9862		66.6668	6.19851	99.8637
		66.7168	0.863209	99.9874		66.721	6.19845	99.8628
		66.7668	0.863183	99.9844		66.7752	6.19848	99.8633
		66.821	0.863096	99.9743		66.8252	6.19842	99.8623
		66.8752	0.862938	99.956		66.8793	6.19835	99.8612
		66.9252	0.862878	99.9491		66.9335	6.19835	99.8611
		66.9752	0.862808	99.9409		66.9835	6.19835	99.8612
		67.0293	0.862984	99.9614		67.0377	6.19832	99.8607
		67.0835	0.863123	99.9775		67.0918	6.19837	99.8615
		67.1335	0.863166	99.9824		67.1418	6.19837	99.8615
		67.1877	0.863211	99.9876		67.196	6.19838	99.8616
		67.2418	0.863184	99.9845		67.2502	6.19837	99.8615
		67.2918	0.8631	99.9747		67.3002	6.19842	99.8623
		67.346	0.86308	99.9725		67.3543	6.19839	99.8619
		67.4002	0.863159	99.9817		67.4085	6.19838	99.8617
		67.4502	0.863172	99.9831		67.4585	6.19833	99.8608
		67.5043	0.863169	99.9827		67.5127	6.19826	99.8597
		67.5585	0.863121	99.9772		67.5668	6.19829	99.8602
		67.6085	0.863126	99.9778		67.6168	6.19828	99.86
		67.6627	0.863078	99.9722		67.671	6.19827	99.8599
		67.7168	0.863074	99.9718		67.7252	6.1983	99.8604
		67.7668	0.863153	99.9809		67.7752	6.19834	99.861
		67.821	0.863129	99.9782		67.8252	6.19833	99.8608
		67.8752	0.863153	99.9809		67.8793	6.19831	99.8606
		67.9252	0.863211	99.9876		67.9335	6.19831	99.8605
		67.9752	0.863204	99.9868		67.9835	6.19828	99.86
		68.0293	0.863145	99.9799		68.0377	6.1983	99.8604
		68.0835	0.863126	99.9777		68.0918	6.19833	99.8609
		68.1335	0.863141	99.9795		68.1418	6.19831	99.8606
		68.1877	0.86311	99.976		68.196	6.19837	99.8614
		68.2418	0.863159	99.9815		68.2502	6.19836	99.8613
		68.2918	0.863185	99.9846		68.3002	6.19823	99.8593
		68.346	0.863188	99.9849		68.3543	6.19822	99.8591
		68.4002	0.86317	99.9828		68.4085	6.19831	99.8606
		68.4502	0.863153	99.9809		68.4585	6.19831	99.8606
		68.5043	0.86311	99.9759		68.5127	6.19823	99.8592
		68.5585	0.863052	99.9692		68.5668	6.19826	99.8597
		68.6085	0.86311	99.9759		68.6168	6.19822	99.8591
		68.6627	0.86313	99.9782		68.671	6.19818	99.8585
		68.7168	0.863158	99.9814		68.7252	6.19818	99.8584
		68.7668	0.8631	99.9748		68.7752	6.19822	99.859
		68.821	0.863136	99.979		68.8293	6.19818	99.8584
		68.8752	0.863112	99.9761		68.8835	6.19815	99.8579
		68.9252	0.863091	99.9738		68.9335	6.19817	99.8583
		68.9752	0.863078	99.9722		68.9877	6.19811	99.8574
		69.0293	0.863103	99.9751		69.0418	6.19816	99.8581
		69.0835	0.863162	99.982		69.0918	6.19818	99.8585
		69.1335	0.863172	99.9831		69.146	6.19821	99.8589
		69.1877	0.863205	99.987		69.2002	6.19822	99.859
		69.2418	0.86317	99.9829		69.2502	6.19819	99.8586
		69.2918	0.863145	99.9799		69.3002	6.19818	99.8584
		69.346	0.863124	99.9775		69.3543	6.19817	99.8583
		69.4002	0.863162	99.982		69.4085	6.19809	99.857
		69.4502	0.863194	99.9856		69.4585	6.19811	99.8573
		69.5043	0.863144	99.9798		69.5127	6.19816	99.8581
		69.5585	0.863097	99.9744		69.5668	6.1981	99.8571
		69.6085	0.863119	99.9769		69.6168	6.1981	99.8572
		69.6627	0.863115	99.9765		69.671	6.19811	99.8574
		69.7168	0.863148	99.9804		69.7252	6.19811	99.8574
		69.7668	0.863142	99.9796		69.7752	6.19808	99.8569
		69.821	0.863139	99.9792		69.8293	6.19809	99.8569
		69.8752	0.863121	99.9772		69.8835	6.19807	99.8566
		69.9252	0.863156	99.9813		69.9335	6.19813	99.8576
		69.9752	0.863179	99.9839		69.9877	6.19811	99.8573
		70.0293	0.863156	99.9813		70.0418	6.1981	99.8571
		70.0835	0.863107	99.9756		70.0918	6.19812	99.8575
		70.1335	0.863098	99.9745		70.146	6.19804	99.8562
		70.1877	0.863101	99.9749		70.2002	6.19803	99.856
		70.2418	0.863125	99.9776		70.2502	6.1981	99.8571
		70.2918	0.863112	99.9762		70.3043	6.19803	99.856
		70.346	0.863155	99.9811		70.3585	6.19794	99.8545
		70.4002	0.863144	99.9799		70.4085	6.19793	99.8544
		70.4502	0.863132	99.9785		70.4627	6.19793	99.8544
		70.5043	0.863056	99.9697		70.5168	6.198	99.8556
		70.5585	0.863149	99.9805		70.5668	6.198	99.8555
		70.6085	0.863208	99.9872		70.621	6.198	99.8556
		70.6627	0.863101	99.9749		70.6752	6.19799	99.8554
		70.7168	0.863102	99.975		70.7252	6.19799	99.8554
		70.7668	0.862335	99.8862		70.7752	6.19797	99.855
		70.821	0.861956	99.8422		70.8293	6.19801	99.8558
		70.8752	0.863023	99.9658		70.8835	6.19796	99.8549
		70.9252	0.863101	99.9748		70.9335	6.1979	99.854
		70.9752	0.863061	99.9702		70.9877	6.198	99.8556
		71.0293	0.863075	99.9719		71.0418	6.19802	99.8559
		71.0835	0.863126	99.9777		71.0918	6.19798	99.8552
		71.1335	0.863127	99.9779		71.146	6.19796	99.8549
		71.1877	0.863113	99.9762		71.2002	6.1979	99.8539
		71.2418	0.86305	99.969		71.2502	6.1979	99.854
		71.2918	0.863084	99.9729		71.3043	6.19786	99.8533
		71.346	0.863128	99.9779		71.3585	6.19789	99.8538
		71.4002	0.86314	99.9794		71.4085	6.19794	99.8545
		71.4502	0.863148	99.9803		71.4627	6.19787	99.8535
		71.5043	0.863097	99.9745		71.5168	6.19791	99.854
		71.5585	0.863121	99.9773		71.5668	6.19793	99.8543
		71.6085	0.863135	99.9788		71.621	6.19786	99.8532
		71.6627	0.863134	99.9787		71.6752	6.19784	99.853
		71.7168	0.863062	99.9704		71.7252	6.19786	99.8533
		71.7668	0.863125	99.9776		71.7793	6.19791	99.854
		71.821	0.86318	99.984		71.8335	6.19784	99.853
		71.8752	0.863197	99.986		71.8835	6.19788	99.8536
		71.9252	0.86321	99.9875		71.9377	6.19793	99.8544
		71.9752	0.863202	99.9866		71.9918	6.19789	99.8537
		72.0293	0.86315	99.9805		72.0418	6.19787	99.8534
		72.0835	0.863122	99.9773		72.096	6.19794	99.8546
		72.1335	0.863145	99.98		72.1502	6.19798	99.8551
		72.1877	0.863164	99.9822		72.2002	6.19792	99.8543
		72.2418	0.863148	99.9803		72.2502	6.19789	99.8538
		72.2918	0.863128	99.978		72.3043	6.1979	99.8539
		72.346	0.863162	99.982		72.3585	6.19783	99.8528
		72.4002	0.863154	99.9811		72.4085	6.19778	99.8519
		72.4502	0.863099	99.9746		72.4627	6.19783	99.8528
		72.5043	0.86305	99.969		72.5168	6.19785	99.8531
		72.5585	0.863037	99.9675		72.5668	6.19787	99.8535
		72.6085	0.863154	99.981		72.621	6.19789	99.8537
		72.6627	0.863195	99.9858		72.6752	6.19783	99.8529
		72.7168	0.863135	99.9788		72.7252	6.19777	99.8519
		72.7668	0.863137	99.9791		72.7793	6.19771	99.8509
		72.821	0.863141	99.9796		72.8335	6.19775	99.8515
		72.8752	0.863156	99.9813		72.8835	6.19778	99.8521
		72.9252	0.863179	99.9839		72.9377	6.19769	99.8506
		72.9752	0.863168	99.9826		72.9918	6.19768	99.8504
		73.0293	0.863133	99.9785		73.0418	6.19769	99.8505
		73.0835	0.863125	99.9776		73.096	6.19769	99.8505
		73.1335	0.863131	99.9784		73.1502	6.19775	99.8515
		73.1877	0.863177	99.9837		73.2002	6.19771	99.8508
		73.2418	0.863145	99.9799		73.2543	6.19769	99.8505
		73.2918	0.863054	99.9694		73.3085	6.19776	99.8517
		73.346	0.862543	99.9102		73.3585	6.19774	99.8513
		73.4002	0.862152	99.8649		73.4127	6.19771	99.8508
		73.4502	0.862931	99.9551		73.4668	6.19769	99.8506
		73.5043	0.863077	99.9721		73.5168	6.19768	99.8503
		73.5585	0.863107	99.9756		73.571	6.19765	99.8499
		73.6085	0.863133	99.9786		73.6252	6.19766	99.8501
		73.6627	0.863147	99.9802		73.6752	6.19764	99.8498
		73.7168	0.863117	99.9767		73.7252	6.19759	99.8489
		73.7668	0.863073	99.9716		73.7793	6.19768	99.8503
		73.821	0.86308	99.9724		73.8335	6.19766	99.85
		73.8752	0.863123	99.9775		73.8835	6.1976	99.8491
		73.9252	0.863138	99.9792		73.9377	6.19768	99.8504
		73.9752	0.8631	99.9748		73.9918	6.19768	99.8504
		74.0293	0.863091	99.9738		74.0418	6.19759	99.8489
		74.0835	0.863109	99.9759		74.096	6.19759	99.849
		74.1335	0.863074	99.9718		74.1502	6.19762	99.8495
		74.1877	0.862781	99.9379		74.2002	6.19758	99.8487
		74.2418	0.862148	99.8644		74.2543	6.19759	99.8489
		74.2918	0.862889	99.9504		74.3085	6.19754	99.8482
		74.346	0.863134	99.9787		74.3585	6.19753	99.8479
		74.4002	0.863152	99.9808		74.4127	6.19755	99.8483
		74.4502	0.863092	99.9738		74.4668	6.19756	99.8484
		74.5043	0.863048	99.9687		74.5168	6.19754	99.848
		74.5585	0.863014	99.9648		74.571	6.19757	99.8486
		74.6085	0.863066	99.9708		74.6252	6.19757	99.8487
		74.6627	0.863128	99.978		74.6752	6.19753	99.8479
		74.7168	0.863137	99.979		74.7293	6.19752	99.8478
		74.7668	0.863144	99.9798		74.7835	6.1975	99.8475
		74.821	0.863171	99.983		74.8335	6.19754	99.8481
		74.8752	0.863169	99.9827		74.8877	6.19749	99.8473
		74.9252	0.863092	99.9738		74.9418	6.19747	99.847
		74.9752	0.863091	99.9737		74.9918	6.19762	99.8494
		75.0293	0.863178	99.9838		75.046	6.1976	99.8491
		75.0835	0.863132	99.9785		75.1002	6.19751	99.8477
		75.1335	0.863081	99.9725		75.1502	6.19753	99.8479
		75.1877	0.863111	99.976		75.2002	6.19753	99.848
		75.2418	0.86309	99.9736		75.2543	6.19748	99.8472
		75.2918	0.863092	99.9738		75.3085	6.19747	99.8471
		75.346	0.863097	99.9744		75.3585	6.19743	99.8463
		75.4002	0.863104	99.9752		75.4127	6.19741	99.846
		75.4502	0.863124	99.9775		75.4668	6.1974	99.8459
		75.5043	0.863131	99.9784		75.5168	6.19738	99.8456
		75.5585	0.863177	99.9837		75.571	6.19737	99.8454
		75.6085	0.863155	99.9811		75.6252	6.19735	99.8451
		75.6627	0.863113	99.9762		75.6752	6.19742	99.8461
		75.7168	0.863051	99.9691		75.7293	6.19744	99.8465
		75.7668	0.863052	99.9692		75.7835	6.19746	99.8468
		75.821	0.863045	99.9684		75.8335	6.19742	99.8462
		75.8752	0.863063	99.9705		75.8877	6.19735	99.8451
		75.9252	0.863079	99.9724		75.9418	6.19737	99.8454
		75.9752	0.863088	99.9733		75.9918	6.19738	99.8455
		76.0293	0.863116	99.9766		76.046	6.19739	99.8458
		76.0835	0.863097	99.9744		76.1002	6.19738	99.8456
		76.1335	0.863065	99.9707		76.1502	6.19738	99.8455
		76.1877	0.863027	99.9663		76.2043	6.19741	99.846
		76.2418	0.863091	99.9737		76.2585	6.19739	99.8457
		76.2918	0.863095	99.9742		76.3085	6.19733	99.8448
		76.346	0.86311	99.976		76.3627	6.19735	99.8451
		76.4002	0.863066	99.9708		76.4168	6.1974	99.8458
		76.4502	0.863062	99.9704		76.4668	6.19746	99.8468
		76.5043	0.863062	99.9704		76.521	6.19738	99.8456
		76.5585	0.863104	99.9752		76.5752	6.19735	99.8451
		76.6085	0.86309	99.9736		76.6252	6.19745	99.8466
		76.6627	0.86307	99.9713		76.6752	6.19748	99.8472
		76.7168	0.862989	99.9619		76.7293	6.19747	99.847
		76.7668	0.863077	99.9721		76.7835	6.19742	99.8462
		76.821	0.863113	99.9763		76.8335	6.19737	99.8454
		76.8752	0.863173	99.9832		76.8877	6.1973	99.8443
		76.9252	0.863128	99.9779		76.9418	6.19727	99.8437
		76.9752	0.86313	99.9782		76.9918	6.19731	99.8444
		77.0293	0.863144	99.9799		77.046	6.19731	99.8445
		77.0835	0.863089	99.9735		77.1002	6.1973	99.8443
		77.1335	0.863074	99.9717		77.1502	6.19728	99.8439
		77.1877	0.86302	99.9655		77.2043	6.19726	99.8437
		77.2418	0.863042	99.968		77.2585	6.19722	99.843
		77.2918	0.86312	99.977		77.3085	6.19729	99.8441
		77.346	0.863101	99.9748		77.3627	6.19727	99.8437
		77.4002	0.863126	99.9778		77.4168	6.19725	99.8435
		77.4502	0.863094	99.9741		77.4668	6.19724	99.8433
		77.5043	0.86307	99.9713		77.521	6.19724	99.8434
		77.5585	0.863045	99.9684		77.5752	6.19724	99.8433
		77.6085	0.863109	99.9758		77.6252	6.19725	99.8435
		77.6627	0.863101	99.9748		77.6793	6.19721	99.8428
		77.7168	0.863074	99.9718		77.7335	6.19717	99.8422
		77.7668	0.863056	99.9697		77.7835	6.19716	99.842
		77.821	0.863124	99.9775		77.8377	6.19719	99.8426
		77.8752	0.863098	99.9745		77.8918	6.19725	99.8435
		77.9252	0.863058	99.9699		77.9418	6.19724	99.8433
		77.9752	0.863069	99.9711		77.996	6.19717	99.8421
		78.0293	0.862811	99.9413		78.0502	6.19714	99.8417
		78.0835	0.86233	99.8856		78.1002	6.19718	99.8423
		78.1335	0.862843	99.945		78.1502	6.1972	99.8427
		78.1877	0.8631	99.9748		78.2043	6.19722	99.843
		78.2418	0.863121	99.9771		78.2585	6.19732	99.8446
		78.2918	0.863032	99.9669		78.3085	6.1972	99.8427
		78.346	0.863085	99.973		78.3627	6.1971	99.8411
		78.4002	0.863159	99.9816		78.4168	6.19707	99.8405
		78.4502	0.863108	99.9757		78.4668	6.19707	99.8406
		78.5043	0.863076	99.972		78.521	6.19712	99.8414
		78.5585	0.863058	99.9699		78.5752	6.19707	99.8406
		78.6085	0.863047	99.9686		78.6252	6.1971	99.841
		78.6627	0.863073	99.9716		78.6793	6.19716	99.842
		78.7168	0.863081	99.9725		78.7335	6.19708	99.8407
		78.7668	0.863105	99.9753		78.7835	6.19714	99.8416
		78.821	0.863166	99.9824		78.8377	6.19715	99.8419
		78.8752	0.863081	99.9726		78.8918	6.19711	99.8411
		78.9252	0.863051	99.969		78.9418	6.19716	99.8419
		78.9752	0.863093	99.974		78.996	6.19707	99.8406
		79.0293	0.863096	99.9743		79.0502	6.19706	99.8403
		79.0835	0.863109	99.9758		79.1002	6.19707	99.8405
		79.1335	0.863123	99.9774		79.1543	6.19709	99.8409
		79.1877	0.863089	99.9735		79.2085	6.19709	99.8408
		79.2418	0.863093	99.9739		79.2585	6.19704	99.8401
		79.2918	0.863109	99.9758		79.3127	6.19703	99.84
		79.346	0.863145	99.98		79.3668	6.19708	99.8407
		79.4002	0.863123	99.9774		79.4168	6.19703	99.84
		79.4502	0.863042	99.968		79.471	6.19701	99.8396
		79.5043	0.863013	99.9647		79.5252	6.19701	99.8396
		79.5585	0.863085	99.973		79.5752	6.19706	99.8404
		79.6085	0.863094	99.974		79.6252	6.19702	99.8397
		79.6627	0.863019	99.9654		79.6793	6.19698	99.839
		79.7168	0.863044	99.9683		79.7335	6.19703	99.84
		79.7668	0.863081	99.9726		79.7835	6.19707	99.8406
		79.821	0.863061	99.9702		79.8377	6.19713	99.8415
		79.8752	0.862886	99.95		79.8918	6.19708	99.8407
		79.9252	0.862826	99.943		79.9418	6.19702	99.8398
		79.9752	0.862979	99.9608		79.996	6.19702	99.8398
		80.0293	0.863068	99.9711		80.0502	6.1971	99.841
		80.0835	0.863128	99.9781		80.1002	6.19708	99.8407
		80.1335	0.863177	99.9837		80.1543	6.19697	99.839
		80.1877	0.863158	99.9815		80.2085	6.197	99.8394
		80.2418	0.863167	99.9825		80.2585	6.19698	99.8392
		80.2918	0.863154	99.9811		80.3127	6.19696	99.8388
		80.346	0.863121	99.9772		80.3668	6.19697	99.8389
		80.4002	0.863144	99.9798		80.4168	6.19698	99.839
		80.4502	0.863094	99.9741		80.471	6.19702	99.8397
		80.5043	0.863058	99.97		80.5252	6.19703	99.8399
		80.5585	0.863126	99.9778		80.5752	6.197	99.8395
		80.6085	0.863126	99.9777		80.6293	6.197	99.8394
		80.6627	0.86312	99.977		80.6835	6.19695	99.8387
		80.7168	0.863112	99.9761		80.7335	6.19695	99.8387
		80.7668	0.863111	99.9761		80.7877	6.19702	99.8397
		80.821	0.863113	99.9763		80.8418	6.19705	99.8402
		80.8752	0.863105	99.9753		80.8918	6.19697	99.839
		80.9252	0.863075	99.9718		80.946	6.19693	99.8384
		80.9752	0.863046	99.9684		81.0002	6.19692	99.8382
		81.0293	0.863073	99.9716		81.0502	6.19687	99.8374
		81.0835	0.863116	99.9766		81.1002	6.19688	99.8375
		81.1335	0.863109	99.9758		81.1543	6.19692	99.8381
		81.1877	0.863029	99.9665		81.2085	6.19697	99.8389
		81.2418	0.863047	99.9686		81.2585	6.19696	99.8388
		81.2918	0.863035	99.9672		81.3127	6.19688	99.8376
		81.346	0.863078	99.9722		81.3668	6.19686	99.8371
		81.4002	0.863132	99.9785		81.4168	6.19679	99.836
		81.4502	0.863168	99.9827		81.471	6.19682	99.8366
		81.5043	0.86313	99.9782		81.5252	6.19691	99.838
		81.5585	0.863116	99.9766		81.5752	6.19688	99.8375
		81.6085	0.863081	99.9725		81.6293	6.19681	99.8363
		81.6627	0.863023	99.9659		81.6835	6.19678	99.8358
		81.7168	0.863053	99.9693		81.7335	6.19682	99.8365
		81.7668	0.863142	99.9796		81.7877	6.19677	99.8357
		81.821	0.863136	99.979		81.8418	6.19681	99.8364
		81.8752	0.86315	99.9806		81.8918	6.19687	99.8374
		81.9252	0.863164	99.9822		81.946	6.19679	99.8361
		81.9752	0.863123	99.9774		82.0002	6.19674	99.8352
		82.0293	0.863106	99.9755		82.0502	6.19672	99.8349
		82.0835	0.863096	99.9743		82.1043	6.19668	99.8342
		82.1335	0.863121	99.9772		82.1585	6.19667	99.8341
		82.1877	0.863099	99.9746		82.2085	6.19666	99.834
		82.2418	0.86305	99.9689		82.2627	6.1967	99.8345
		82.2918	0.863035	99.9672		82.3168	6.1968	99.8362
		82.346	0.86256	99.9122		82.3668	6.1967	99.8345
		82.4002	0.862704	99.9289		82.421	6.19667	99.8342
		82.4502	0.863058	99.9698		82.4752	6.1967	99.8347
		82.5043	0.863012	99.9645		82.5252	6.19663	99.8334
		82.5585	0.863047	99.9686		82.5752	6.19661	99.8332
		82.6085	0.863074	99.9718		82.6293	6.19661	99.8332
		82.6627	0.863074	99.9718		82.6835	6.19659	99.8329
		82.7168	0.863067	99.971		82.7335	6.19656	99.8324
		82.7668	0.863068	99.9711		82.7877	6.19662	99.8334
		82.821	0.863118	99.9768		82.8418	6.19667	99.8341
		82.8752	0.863123	99.9774		82.8918	6.19663	99.8335
		82.9252	0.863006	99.9638		82.946	6.1966	99.833
		82.9752	0.862912	99.9529		83.0002	6.1966	99.833
		83.0293	0.863011	99.9644		83.0502	6.19656	99.8324
		83.0835	0.863088	99.9733		83.1043	6.19652	99.8317
		83.1335	0.86313	99.9782		83.1585	6.19658	99.8326
		83.1877	0.8631	99.9747		83.2085	6.19659	99.8329
		83.2418	0.863052	99.9692		83.2627	6.19659	99.8329
		83.2918	0.863081	99.9725		83.3168	6.19658	99.8326
		83.346	0.863089	99.9735		83.3668	6.19649	99.8312
		83.4002	0.863072	99.9715		83.421	6.19649	99.8313
		83.4502	0.86312	99.9771		83.4752	6.19659	99.8329
		83.5043	0.863096	99.9743		83.5252	6.19658	99.8327
		83.5585	0.863007	99.964		83.5793	6.19653	99.8319
		83.6085	0.862993	99.9624		83.6335	6.19653	99.8319
		83.6627	0.863058	99.9699		83.6835	6.19653	99.8319
		83.7168	0.863063	99.9705		83.7377	6.19648	99.831
		83.7668	0.863008	99.9642		83.7918	6.1965	99.8314
		83.821	0.863043	99.9681		83.8418	6.19653	99.8318
		83.8752	0.863052	99.9692		83.896	6.19649	99.8313
		83.9252	0.862996	99.9627		83.9502	6.19647	99.8309
		83.9752	0.86303	99.9667		84.0002	6.19641	99.8299
		84.0293	0.863047	99.9686		84.0502	6.19642	99.8301
		84.0835	0.863069	99.9712		84.1043	6.19642	99.8301
		84.1335	0.863104	99.9752		84.1585	6.19645	99.8306
		84.1877	0.863078	99.9722		84.2085	6.19651	99.8315
		84.2418	0.863049	99.9688		84.2627	6.19647	99.8308
		84.2918	0.862996	99.9627		84.3168	6.19647	99.8309
		84.346	0.862997	99.9628		84.3668	6.19646	99.8307
		84.4002	0.863047	99.9686		84.421	6.19646	99.8307
		84.4502	0.863053	99.9693		84.4752	6.19651	99.8315
		84.5043	0.863037	99.9675		84.5252	6.1965	99.8314
		84.5585	0.863042	99.968		84.5793	6.19647	99.8309
		84.6085	0.863108	99.9757		84.6335	6.19643	99.8303
		84.6627	0.863105	99.9754		84.6835	6.19634	99.8289
		84.7168	0.863098	99.9745		84.7377	6.19632	99.8285
		84.7668	0.863103	99.9751		84.7918	6.19639	99.8295
		84.821	0.863059	99.9701		84.8418	6.19643	99.8302
		84.8752	0.863079	99.9724		84.896	6.19637	99.8293
		84.9252	0.863041	99.968		84.9502	6.19637	99.8294
		84.9752	0.863028	99.9664		85.0002	6.19634	99.8288
		85.0293	0.863057	99.9698		85.0543	6.19635	99.829
		85.0835	0.863077	99.972		85.1085	6.19638	99.8294
		85.1335	0.863068	99.9711		85.1585	6.1964	99.8297
		85.1877	0.86307	99.9713		85.2127	6.19645	99.8306
		85.2418	0.863071	99.9714		85.2668	6.19647	99.8309
		85.2918	0.863037	99.9675		85.3168	6.19637	99.8293
		85.346	0.863027	99.9664		85.371	6.19629	99.8279
		85.4002	0.862996	99.9627		85.4252	6.19634	99.8289
		85.4502	0.862991	99.9622		85.4752	6.19635	99.829
		85.5043	0.863077	99.9721		85.5252	6.19635	99.829
		85.5585	0.863059	99.9701		85.5793	6.19629	99.828
		85.6085	0.863098	99.9745		85.6335	6.19631	99.8283
		85.6627	0.863078	99.9722		85.6835	6.19633	99.8286
		85.7168	0.863013	99.9646		85.7377	6.19634	99.8288
		85.7668	0.863031	99.9667		85.7918	6.19637	99.8292
		85.821	0.863049	99.9689		85.8418	6.19634	99.8288
		85.8752	0.863105	99.9753		85.896	6.19633	99.8286
		85.9252	0.863092	99.9738		85.9502	6.19645	99.8306
		85.9752	0.863007	99.9639		86.0002	6.19641	99.8299
		86.0293	0.863041	99.9679		86.0543	6.19626	99.8275
		86.0835	0.863107	99.9756		86.1085	6.19626	99.8275
		86.1335	0.863081	99.9726		86.1585	6.19632	99.8285
		86.1877	0.86306	99.9701		86.2127	6.19632	99.8284
		86.2418	0.863092	99.9738		86.2668	6.19622	99.8269
		86.2918	0.863071	99.9715		86.3168	6.19621	99.8268
		86.346	0.86308	99.9724		86.371	6.19618	99.8262
		86.4002	0.863095	99.9742		86.4252	6.19619	99.8264
		86.4502	0.863087	99.9732		86.4752	6.1962	99.8266
		86.5043	0.863051	99.9691		86.5293	6.19621	99.8267
		86.5585	0.863058	99.9699		86.5835	6.19623	99.8271
		86.6085	0.863055	99.9696		86.6335	6.19625	99.8273
		86.6627	0.863123	99.9774		86.6877	6.19623	99.827
		86.7168	0.863038	99.9676		86.7418	6.19614	99.8255
		86.7668	0.863008	99.9641		86.7918	6.19608	99.8245
		86.821	0.863065	99.9707		86.846	6.19613	99.8254
		86.8752	0.863045	99.9684		86.9002	6.19614	99.8255
		86.9252	0.863079	99.9724		86.9502	6.1962	99.8265
		86.9752	0.863134	99.9787		87.0002	6.19623	99.827
		87.0293	0.863106	99.9754		87.0543	6.19614	99.8256
		87.0835	0.863087	99.9732		87.1085	6.19616	99.8259
		87.1335	0.863054	99.9694		87.1585	6.19615	99.8257
		87.1877	0.863086	99.9731		87.2127	6.19614	99.8256
		87.2418	0.863103	99.9751		87.2668	6.19613	99.8254
		87.2918	0.863041	99.9679		87.3168	6.19614	99.8256
		87.346	0.863031	99.9667		87.371	6.19611	99.825
		87.4002	0.863084	99.9729		87.4252	6.19614	99.8256
		87.4502	0.863049	99.9688		87.4752	6.19618	99.8261
		87.5043	0.863083	99.9728		87.5293	6.19614	99.8256
		87.5585	0.863074	99.9717		87.5835	6.19606	99.8243
		87.6085	0.863051	99.969		87.6335	6.1961	99.825
		87.6627	0.863014	99.9648		87.6877	6.19608	99.8246
		87.7168	0.863059	99.97		87.7418	6.19594	99.8223
		87.7668	0.863114	99.9764		87.7918	6.19589	99.8215
		87.821	0.863013	99.9647		87.846	6.196	99.8234
		87.8752	0.863035	99.9672		87.9002	6.19603	99.8238
		87.9252	0.863116	99.9766		87.9502	6.19605	99.8241
		87.9752	0.863048	99.9687		88.0043	6.19609	99.8248
		88.0293	0.863033	99.967		88.0585	6.19607	99.8245
		88.0835	0.863068	99.9711		88.1085	6.19607	99.8244
		88.1335	0.86306	99.9702		88.1627	6.19608	99.8247
		88.1877	0.863077	99.9721		88.2168	6.19599	99.8232
		88.2418	0.863072	99.9715		88.2668	6.19597	99.8228
		88.2918	0.863037	99.9675		88.321	6.19603	99.8238
		88.346	0.863049	99.9689		88.3752	6.19609	99.8248
		88.4002	0.86303	99.9667		88.4252	6.19608	99.8245
		88.4502	0.863014	99.9648		88.4752	6.1961	99.825
		88.5043	0.863016	99.965		88.5293	6.19611	99.8251
		88.5585	0.863061	99.9702		88.5835	6.19601	99.8234
		88.6085	0.86301	99.9643		88.6335	6.19601	99.8234
		88.6627	0.862994	99.9625		88.6877	6.19603	99.8237
		88.7168	0.863067	99.9709		88.7418	6.19593	99.8222
		88.7668	0.863076	99.972		88.7918	6.19596	99.8227
		88.821	0.863044	99.9683		88.846	6.19604	99.824
		88.8752	0.863046	99.9686		88.9002	6.19597	99.8229
		88.9252	0.863013	99.9646		88.9502	6.19586	99.821
		88.9752	0.863058	99.9698		89.0043	6.19586	99.821
		89.0293	0.863029	99.9665		89.0585	6.19588	99.8213
		89.0835	0.863062	99.9703		89.1085	6.1959	99.8217
		89.1335	0.863081	99.9726		89.1627	6.19587	99.8212
		89.1877	0.863033	99.967		89.2168	6.19595	99.8225
		89.2418	0.862998	99.963		89.2668	6.19602	99.8236
		89.2918	0.86299	99.962		89.321	6.19601	99.8235
		89.346	0.863045	99.9684		89.3752	6.19591	99.8219
		89.4002	0.863016	99.965		89.4252	6.19588	99.8214
		89.4502	0.863	99.9632		89.4793	6.19592	99.8221
		89.5043	0.863108	99.9757		89.5335	6.19593	99.8221
		89.5585	0.863115	99.9765		89.5835	6.19592	99.8221
		89.6085	0.863062	99.9704		89.6377	6.19597	99.8228
		89.6627	0.862999	99.963		89.6918	6.19601	99.8235
		89.7168	0.863004	99.9636		89.7418	6.19592	99.822
		89.7668	0.863009	99.9642		89.796	6.19583	99.8206
		89.821	0.86297	99.9597		89.8502	6.19586	99.8211
		89.8752	0.862983	99.9612		89.9002	6.1959	99.8217
		89.9252	0.862998	99.9629		89.9502	6.19575	99.8193
		89.9752	0.863018	99.9653		90.0043	6.19577	99.8196
		90.0293	0.863025	99.9661		90.0585	6.19587	99.8212
		90.0835	0.863027	99.9663		90.1085	6.19583	99.8206
		90.1335	0.86301	99.9643		90.1627	6.19578	99.8198
		90.1877	0.863047	99.9687		90.2168	6.1958	99.8201
		90.2418	0.863042	99.968		90.2668	6.19584	99.8207
		90.2918	0.862994	99.9625		90.321	6.19581	99.8203
		90.346	0.863049	99.9689		90.3752	6.19578	99.8198
		90.4002	0.863023	99.9659		90.4252	6.19577	99.8196
		90.4502	0.862976	99.9604		90.4793	6.19581	99.8203
		90.5043	0.863025	99.9661		90.5335	6.19584	99.8207
		90.5585	0.863033	99.967		90.5835	6.19586	99.8211
		90.6085	0.863027	99.9664		90.6377	6.19584	99.8207
		90.6627	0.863043	99.9681		90.6918	6.19585	99.8209
		90.7168	0.86302	99.9655		90.7418	6.1958	99.8201
		90.7668	0.863032	99.9668		90.796	6.1957	99.8185
		90.821	0.863066	99.9708		90.8502	6.19572	99.8188
		90.8752	0.863078	99.9722		90.9002	6.19572	99.8188
		90.9252	0.863121	99.9772		90.9543	6.19572	99.8188
		90.9752	0.8631	99.9748		91.0085	6.19567	99.8181
		91.0293	0.86303	99.9666		91.0585	6.1957	99.8185
		91.0835	0.862999	99.9631		91.1127	6.19569	99.8183
		91.1335	0.863065	99.9707		91.1668	6.19569	99.8183
		91.1877	0.863079	99.9724		91.2168	6.19569	99.8183
		91.2418	0.863061	99.9702		91.271	6.19567	99.8179
		91.2918	0.86304	99.9678		91.3252	6.19569	99.8183
		91.346	0.863048	99.9688		91.3752	6.19573	99.8189
		91.4002	0.863028	99.9664		91.4252	6.19572	99.8188
		91.4502	0.863075	99.9719		91.4793	6.19567	99.8179
		91.5043	0.863019	99.9653		91.5335	6.1956	99.8169
		91.5585	0.862933	99.9554		91.5835	6.19563	99.8174
		91.6085	0.862973	99.9601		91.6377	6.19564	99.8174
		91.6627	0.862981	99.961		91.6918	6.19566	99.8178
		91.7168	0.862888	99.9503		91.7418	6.19566	99.8178
		91.7668	0.862986	99.9616		91.796	6.19569	99.8183
		91.821	0.862936	99.9558		91.8502	6.19563	99.8174
		91.8752	0.862986	99.9615		91.9002	6.19558	99.8165
		91.9252	0.863018	99.9653		91.9543	6.19563	99.8173
		91.9752	0.862952	99.9576		92.0085	6.19561	99.817
		92.0293	0.862973	99.9601		92.0585	6.19564	99.8175
		92.0835	0.863004	99.9636		92.1127	6.19562	99.8171
		92.1335	0.863054	99.9694		92.1668	6.19562	99.8171
		92.1877	0.863008	99.9641		92.2168	6.19555	99.8161
		92.2418	0.863021	99.9656		92.271	6.19559	99.8168
		92.2918	0.862971	99.9598		92.3252	6.1956	99.8169
		92.346	0.862991	99.9621		92.3752	6.19561	99.817
		92.4002	0.863045	99.9684		92.4293	6.19556	99.8162
		92.4502	0.863079	99.9723		92.4835	6.1955	99.8153
		92.5043	0.863012	99.9646		92.5335	6.19548	99.8149
		92.5585	0.86305	99.969		92.5877	6.19552	99.8155
		92.6085	0.863101	99.9749		92.6418	6.19552	99.8156
		92.6627	0.863045	99.9684		92.6918	6.19549	99.815
		92.7168	0.863032	99.9669		92.746	6.1955	99.8153
		92.7668	0.863014	99.9648		92.8002	6.1955	99.8153
		92.821	0.862988	99.9618		92.8502	6.19545	99.8145
		92.8752	0.863027	99.9663		92.9002	6.19548	99.8149
		92.9252	0.86308	99.9724		92.9543	6.19556	99.8162
		92.9752	0.863108	99.9757		93.0085	6.19553	99.8157
		93.0293	0.863014	99.9648		93.0585	6.19561	99.817
		93.0835	0.863017	99.9651		93.1127	6.1956	99.8169
		93.1335	0.863082	99.9727		93.1668	6.19552	99.8156
		93.1877	0.863059	99.97		93.2168	6.19546	99.8146
		93.2418	0.863039	99.9678		93.271	6.19546	99.8146
		93.2918	0.863086	99.9732		93.3252	6.19536	99.813
		93.346	0.863056	99.9696		93.3752	6.19534	99.8126
		93.4002	0.863025	99.9661		93.4293	6.19551	99.8154
		93.4502	0.863023	99.9659		93.4835	6.19553	99.8158
		93.5043	0.86301	99.9643		93.5335	6.19551	99.8154
		93.5585	0.863053	99.9693		93.5877	6.19548	99.8149
		93.6085	0.863038	99.9675		93.6418	6.19544	99.8143
		93.6627	0.863034	99.9671		93.6918	6.19545	99.8144
		93.7168	0.863068	99.9711		93.746	6.19545	99.8145
		93.7668	0.863045	99.9684		93.8002	6.19546	99.8146
		93.821	0.862999	99.9631		93.8502	6.19545	99.8145
		93.8752	0.862938	99.956		93.9043	6.19545	99.8144
		93.9252	0.863004	99.9637		93.9585	6.19544	99.8143
		93.9752	0.863031	99.9668		94.0085	6.19544	99.8142
		94.0293	0.863022	99.9657		94.0627	6.19541	99.8139
		94.0835	0.863087	99.9732		94.1168	6.19545	99.8145
		94.1335	0.863047	99.9686		94.1668	6.19541	99.8138
		94.1877	0.862997	99.9629		94.221	6.19546	99.8147
		94.2418	0.863076	99.972		94.2752	6.19551	99.8155
		94.2918	0.863048	99.9687		94.3252	6.19547	99.8148
		94.346	0.862989	99.9619		94.3752	6.19541	99.8138
		94.4002	0.863004	99.9636		94.4293	6.19542	99.814
		94.4502	0.862999	99.963		94.4835	6.19542	99.814
		94.5043	0.863033	99.967		94.5335	6.19541	99.8138
		94.5585	0.863015	99.9649		94.5877	6.19538	99.8133
		94.6085	0.863029	99.9665		94.6418	6.19536	99.8131
		94.6627	0.863062	99.9704		94.6918	6.19531	99.8121
		94.7168	0.863038	99.9675		94.746	6.19526	99.8114
		94.7668	0.863026	99.9662		94.8002	6.19527	99.8115
		94.821	0.862974	99.9602		94.8502	6.19535	99.8128
		94.8752	0.862967	99.9594		94.9043	6.19533	99.8125
		94.9252	0.863039	99.9677		94.9585	6.19533	99.8125
		94.9752	0.863056	99.9697		95.0085	6.19531	99.8122
		95.0293	0.863056	99.9696		95.0627	6.19531	99.8122
		95.0835	0.863065	99.9707		95.1168	6.19527	99.8115
		95.1335	0.863018	99.9653		95.1668	6.19527	99.8116
		95.1877	0.863003	99.9635		95.221	6.19525	99.8112
		95.2418	0.863015	99.9649		95.2752	6.19524	99.8111
		95.2918	0.863003	99.9635		95.3252	6.19529	99.8118
		95.346	0.863043	99.9681		95.3793	6.19524	99.8111
		95.4002	0.863018	99.9652		95.4335	6.19525	99.8112
		95.4502	0.863032	99.9669		95.4835	6.19531	99.8122
		95.5043	0.863014	99.9648		95.5377	6.1953	99.812
		95.5585	0.862959	99.9584		95.5918	6.19521	99.8106
		95.6085	0.862978	99.9606		95.6418	6.19519	99.8103
		95.6627	0.863032	99.9669		95.696	6.19519	99.8103
		95.7168	0.863044	99.9683		95.7502	6.19513	99.8093
		95.7668	0.862993	99.9623		95.8002	6.19512	99.8091
		95.821	0.862964	99.959		95.8502	6.19511	99.809
		95.8752	0.863008	99.9641		95.9043	6.19515	99.8096
		95.9252	0.862989	99.9619		95.9585	6.19515	99.8096
		95.9752	0.862993	99.9623		96.0085	6.19508	99.8086
		96.0293	0.862989	99.9619		96.0627	6.19505	99.808
		96.0835	0.863004	99.9637		96.1168	6.19508	99.8085
		96.1335	0.863006	99.9639		96.1668	6.19511	99.8089
		96.1877	0.863031	99.9668		96.221	6.19515	99.8097
		96.2418	0.862995	99.9626		96.2752	6.19508	99.8084
		96.2918	0.862985	99.9615		96.3252	6.19511	99.8089
		96.346	0.862982	99.9611		96.3793	6.19515	99.8096
		96.4002	0.862984	99.9614		96.4335	6.19511	99.809
		96.4502	0.863025	99.9661		96.4835	6.1952	99.8104
		96.5043	0.86311	99.9759		96.5377	6.19519	99.8102
		96.5585	0.863077	99.9721		96.5918	6.19511	99.809
		96.6085	0.862993	99.9623		96.6418	6.19515	99.8097
		96.6627	0.862965	99.9591		96.696	6.19511	99.8089
		96.7168	0.862889	99.9503		96.7502	6.19506	99.8082
		96.7668	0.862915	99.9533		96.8002	6.19508	99.8085
		96.821	0.862988	99.9618		96.8543	6.19504	99.8078
		96.8752	0.862974	99.9602		96.9085	6.19506	99.8081
		96.9252	0.862974	99.9602		96.9585	6.19502	99.8076
		96.9752	0.862904	99.9521		97.0127	6.19501	99.8074
		97.0293	0.863005	99.9638		97.0668	6.19503	99.8077
		97.0835	0.863066	99.9709		97.1168	6.1951	99.8088
		97.1335	0.863033	99.967		97.171	6.19512	99.8092
		97.1877	0.863005	99.9637		97.2252	6.19505	99.808
		97.2418	0.862973	99.96		97.2752	6.19499	99.807
		97.2918	0.862915	99.9533		97.3252	6.19499	99.807
		97.346	0.862954	99.9579		97.3793	6.19499	99.8071
		97.4002	0.863016	99.9651		97.4335	6.19504	99.8079
		97.4502	0.863017	99.9652		97.4835	6.19507	99.8084
		97.5043	0.863008	99.9641		97.5377	6.19502	99.8075
		97.5585	0.862955	99.958		97.5918	6.19502	99.8075
		97.6085	0.862939	99.9562		97.6418	6.19501	99.8073
		97.6627	0.863021	99.9656		97.696	6.19496	99.8065
		97.7168	0.863066	99.9708		97.7502	6.19486	99.805
		97.7668	0.863046	99.9685		97.8002	6.1949	99.8056
		97.821	0.863017	99.9651		97.8543	6.19493	99.8061
		97.8752	0.863045	99.9684		97.9085	6.19487	99.8052
		97.9252	0.863009	99.9642		97.9585	6.19486	99.805
		97.9752	0.862983	99.9612		98.0127	6.19493	99.8061
		98.0293	0.862975	99.9603		98.0668	6.19491	99.8058
		98.0835	0.862941	99.9564		98.1168	6.19494	99.8062
		98.1335	0.86296	99.9585		98.171	6.195	99.8072
		98.1877	0.862981	99.961		98.2252	6.19496	99.8066
		98.2418	0.863002	99.9635		98.2752	6.1949	99.8055
		98.2918	0.863046	99.9685		98.3293	6.1948	99.8039
		98.346	0.863024	99.966		98.3835	6.19476	99.8033
		98.4002	0.862999	99.963		98.4335	6.19483	99.8045
		98.4502	0.862997	99.9629		98.4877	6.19496	99.8066
		98.5043	0.862982	99.9611		98.5418	6.19487	99.8051
		98.5585	0.862987	99.9617		98.5918	6.19479	99.8038
		98.6085	0.862994	99.9624		98.646	6.19479	99.8038
		98.6627	0.862956	99.958		98.7002	6.19459	99.8005
		98.7168	0.862937	99.9559		98.7502	6.19449	99.7989
		98.7668	0.862923	99.9543		98.8002	6.19471	99.8025
		98.821	0.862959	99.9585		98.8543	6.19482	99.8043
		98.8752	0.862995	99.9626		98.9085	6.19477	99.8036
		98.9252	0.862993	99.9623		98.9585	6.19473	99.8028
		98.9752	0.862955	99.958		99.0127	6.19474	99.803
		99.0293	0.862968	99.9594		99.0668	6.19478	99.8036
		99.0835	0.862961	99.9586		99.1168	6.19471	99.8025
		99.1335	0.862922	99.9542		99.171	6.19474	99.803
		99.1877	0.862919	99.9538		99.2252	6.19475	99.8032
		99.2418	0.862947	99.957		99.2752	6.19478	99.8037
		99.2918	0.86297	99.9597		99.3293	6.19474	99.8031
		99.346	0.862972	99.96		99.3835	6.19468	99.802
		99.4002	0.863007	99.964		99.4335	6.19475	99.8032
		99.4502	0.862929	99.955		99.4877	6.19476	99.8033
		99.5043	0.862945	99.9568		99.5418	6.19473	99.8029
		99.5585	0.862949	99.9572		99.5918	6.19467	99.8018
		99.6085	0.862922	99.9541		99.646	6.19459	99.8006
		99.6627	0.862916	99.9535		99.7002	6.19461	99.8009
		99.7168	0.8629	99.9516		99.7502	6.19464	99.8014
		99.7668	0.862938	99.956		99.8043	6.19461	99.8009
		99.821	0.862987	99.9617		99.8585	6.19456	99.8002
		99.8752	0.862962	99.9588		99.9085	6.19461	99.8009
		99.9252	0.862973	99.96		99.9627	6.19468	99.8021
		99.9752	0.862955	99.958		100.017	6.19465	99.8016
		100.029	0.862936	99.9557		100.067	6.19461	99.8009
		100.084	0.862853	99.9461		100.121	6.19464	99.8014
		100.133	0.862879	99.9492		100.175	6.19462	99.8011
		100.188	0.862949	99.9572		100.225	6.19461	99.8009
		100.242	0.862967	99.9594		100.275	6.19459	99.8005
		100.292	0.862968	99.9595		100.329	6.1946	99.8008
		100.346	0.86299	99.962		100.383	6.1946	99.8008
		100.4	0.862974	99.9602		100.433	6.19457	99.8003
		100.45	0.862976	99.9604		100.488	6.19457	99.8003
		100.504	0.862957	99.9581		100.542	6.19453	99.7996
		100.558	0.862954	99.9578		100.592	6.19452	99.7995
		100.609	0.862925	99.9545		100.646	6.19455	99.8
		100.663	0.862984	99.9613		100.7	6.19457	99.8002
		100.717	0.863026	99.9661		100.75	6.1946	99.8007
		100.767	0.86298	99.9609		100.804	6.19455	99.7999
		100.821	0.862962	99.9588		100.859	6.19446	99.7984
		100.875	0.862948	99.9572		100.909	6.19445	99.7983
		100.925	0.862927	99.9547		100.963	6.1945	99.7992
		100.975	0.862939	99.9561		101.017	6.1945	99.7992
		101.029	0.862959	99.9584		101.067	6.19454	99.7999
		101.084	0.862942	99.9564		101.121	6.19456	99.8001
		101.133	0.862932	99.9553		101.175	6.19456	99.8001
		101.188	0.862945	99.9568		101.225	6.19453	99.7996
		101.242	0.863014	99.9648		101.279	6.19451	99.7992
		101.292	0.863023	99.9658		101.334	6.19443	99.798
		101.346	0.863023	99.9658		101.383	6.19449	99.7989
		101.4	0.863032	99.9669		101.438	6.19453	99.7997
		101.45	0.863017	99.9652		101.492	6.19451	99.7993
		101.504	0.863018	99.9652		101.542	6.19454	99.7997
		101.558	0.863005	99.9638		101.596	6.19447	99.7986
		101.609	0.86299	99.962		101.65	6.19441	99.7977
		101.663	0.862952	99.9576		101.7	6.19442	99.7978
		101.717	0.862944	99.9566		101.75	6.1944	99.7976
		101.767	0.862914	99.9532		101.804	6.19447	99.7987
		101.821	0.862942	99.9564		101.859	6.19455	99.7999
		101.875	0.862933	99.9554		101.909	6.1945	99.7991
		101.925	0.862928	99.9549		101.963	6.19446	99.7985
		101.975	0.862934	99.9555		102.017	6.19446	99.7985
		102.029	0.862892	99.9506		102.067	6.19446	99.7985
		102.084	0.862924	99.9544		102.121	6.19441	99.7977
		102.133	0.862926	99.9546		102.175	6.19439	99.7973
		102.188	0.862933	99.9554		102.225	6.19438	99.7973
		102.242	0.863019	99.9654		102.279	6.19441	99.7977
		102.292	0.863	99.9632		102.334	6.19436	99.7969
		102.346	0.862934	99.9555		102.383	6.1944	99.7975
		102.4	0.862986	99.9616		102.438	6.19438	99.7972
		102.45	0.86295	99.9574		102.492	6.19435	99.7967
		102.504	0.862921	99.954		102.542	6.19434	99.7966
		102.558	0.862957	99.9582		102.596	6.19431	99.7961
		102.609	0.862935	99.9557		102.65	6.19436	99.7969
		102.663	0.862949	99.9572		102.7	6.1944	99.7976
		102.717	0.86298	99.9609		102.754	6.1944	99.7975
		102.767	0.862959	99.9585		102.808	6.19438	99.7972
		102.821	0.862972	99.9599		102.859	6.19435	99.7967
		102.875	0.862999	99.963		102.913	6.19431	99.7961
		102.925	0.86298	99.9608		102.967	6.19436	99.7969
		102.975	0.862984	99.9613		103.017	6.19435	99.7968
		103.029	0.862983	99.9612		103.071	6.19432	99.7962
		103.084	0.862966	99.9592		103.125	6.19423	99.7948
		103.133	0.862942	99.9564		103.175	6.19422	99.7947
		103.188	0.862926	99.9546		103.225	6.19428	99.7956
		103.242	0.863003	99.9635		103.279	6.19429	99.7958
		103.292	0.86297	99.9597		103.334	6.19435	99.7967
		103.346	0.862917	99.9535		103.383	6.19434	99.7966
		103.4	0.862882	99.9495		103.438	6.19428	99.7956
		103.45	0.862926	99.9546		103.492	6.19427	99.7955
		103.504	0.862902	99.9519		103.542	6.1943	99.7959
		103.558	0.862884	99.9497		103.596	6.19422	99.7946
		103.609	0.862903	99.952		103.65	6.19415	99.7935
		103.663	0.862869	99.948		103.7	6.19417	99.7938
		103.717	0.8629	99.9517		103.754	6.19425	99.7951
		103.767	0.862858	99.9468		103.808	6.19425	99.7951
		103.821	0.862852	99.9461		103.859	6.19419	99.7942
		103.875	0.862862	99.9472		103.913	6.19424	99.795
		103.925	0.862857	99.9467		103.967	6.19419	99.7942
		103.975	0.862892	99.9507		104.017	6.19419	99.7942
		104.029	0.862933	99.9555		104.071	6.1942	99.7943
		104.084	0.862982	99.961		104.125	6.19418	99.794
		104.133	0.863007	99.9639		104.175	6.19418	99.794
		104.188	0.862973	99.9601		104.229	6.19421	99.7945
		104.242	0.862931	99.9552		104.284	6.19423	99.7947
		104.292	0.862881	99.9494		104.334	6.19422	99.7946
		104.346	0.862956	99.958		104.388	6.19406	99.792
		104.4	0.862984	99.9613		104.442	6.19409	99.7925
		104.45	0.862941	99.9563		104.492	6.19415	99.7936
		104.504	0.86295	99.9574		104.546	6.19413	99.7931
		104.558	0.862941	99.9563		104.6	6.19409	99.7925
		104.609	0.863026	99.9662		104.65	6.19408	99.7923
		104.663	0.862961	99.9586		104.7	6.19418	99.794
		104.717	0.862882	99.9495		104.754	6.19411	99.7928
		104.767	0.862916	99.9535		104.808	6.1941	99.7927
		104.821	0.862928	99.9548		104.859	6.19407	99.7922
		104.875	0.862891	99.9506		104.913	6.19405	99.7918
		104.925	0.862898	99.9514		104.967	6.19401	99.7913
		104.975	0.862917	99.9536		105.017	6.19404	99.7917
		105.029	0.862904	99.952		105.071	6.19414	99.7933
		105.084	0.862888	99.9502		105.125	6.19414	99.7933
[truncated: 17,005 more rows]
